1 Loss of *Prm1* leads to defective chromatin protamination, impaired  
2 PRM2 processing, reduced sperm motility and subfertility in male mice

3

4 Gina Esther Merges<sup>1</sup>, Julia Meier<sup>1</sup>, Simon Schneider<sup>1</sup>, Alexander Kruse<sup>2</sup>, Andreas Christian  
5 Fröblius<sup>2</sup>, Klaus Steger<sup>2</sup>, Lena Arévalo<sup>1</sup> and Hubert Schorle<sup>1</sup>

6

7 <sup>1</sup> Department of Developmental Pathology, Institute of Pathology, University Hospital Bonn,  
8 Bonn, Germany.

9 <sup>2</sup> Department of Urology, Pediatric Urology and Andrology, Section Molecular Andrology,  
10 Biomedical Research Center of the Justus-Liebig University, Giessen, Germany

11

12 **Keywords**

13 Protamine ratio, chromatin condensation, spermiogenesis, protamine 1 (*Prm1*), PRM2  
14 processing, infertility, subfertility

15

16 **Corresponding author: [schorle@uni-bonn.de](mailto:schorle@uni-bonn.de)**

17

18

19

20 **Abstract**

21

22 One of the key events during spermiogenesis is the hypercondensation of chromatin by  
23 substitution of the majority of histones by protamines. In humans and mice, protamine 1  
24 (*PRM1/Prm1*) and protamine 2 (*PRM2/Prm2*), are expressed in a species-specific ratio.  
25 Using CRISPR-Cas9-mediated gene editing we generated *Prm1*-deficient mice and  
26 demonstrate, that *Prm1*<sup>+/-</sup> mice are subfertile while *Prm1*<sup>-/-</sup> are infertile. *Prm1*-deficiency  
27 was associated with higher levels of 8-OHdG, an indicator for reactive oxygen mediated  
28 DNA-damage. While *Prm1*<sup>+/-</sup> males displayed moderate increased levels of 8-OHdG virtually

29 all sperm of *Prm1*<sup>-/-</sup> males displayed ROS mediated DNA damage. Consequently, DNA  
30 integrity was slightly hampered in *Prm1*<sup>+/-</sup>, while DNA was completely fragmented in *Prm1*<sup>-/-</sup>  
31 animals. Interestingly CMA3 staining which indicates protamine-free DNA revealed, that  
32 *Prm1*<sup>+/-</sup> sperm displayed high levels (93%), compared to *Prm2*<sup>+/-</sup> (29%) and WT (2%)  
33 sperm. This is not due to increased histone retention as demonstrated by mass spectrometry  
34 (MassSpec) of nuclear proteins in *Prm1*<sup>+/-</sup> sperm. Further analysis of the MassSpec data  
35 from sperm nuclear proteome revealed, that only one protein (RPL31) is significantly higher  
36 abundant in *Prm1*<sup>+/-</sup> compared to WT sperm. Comparison of the proteome from *Prm1*<sup>-/-</sup> and  
37 *Prm2*<sup>-/-</sup> to WT suggested, that there are a small number of proteins which differ in  
38 abundance. However, their function was not linked mechanistically to primary defects seen in  
39 *Prm1*<sup>-/-</sup> mice and rather represent a general stress response. Interestingly, using acid urea  
40 gels we found that sperm from *Prm1*<sup>+/-</sup> and *Prm1*<sup>-/-</sup> mice contain a high level of  
41 unprocessed, full-length PRM2. *Prm2* is transcribed as a precursor protein which, upon  
42 binding to DNA is successively processed. Further, the overall ratio of PRM1:PRM2 is  
43 skewed from 1:2 in WT to 1:5 in *Prm1*<sup>+/-</sup> animals. Our results reveal that *Prm1* is required for  
44 proper processing of PRM2 to produce the mature PRM2 which, together with *Prm1* is able  
45 to hypercondense DNA. Hence, the species specific PRM1:PRM2 ratio has to be precisely  
46 controlled in order to retain full fertility.

47

48

## 49 **Introduction**

50

51 During spermatogenesis in the seminiferous epithelium of the testis diploid spermatogonia  
52 differentiate into haploid spermatids. One of the most remarkable changes during  
53 spermiogenesis is complete reorganization of chromatin compaction [1], where histones are  
54 nearly completely substituted by protamines. These are highly basic, arginine rich proteins  
55 [2] which, upon binding to DNA hypercondense chromatin, leading to transcriptional silencing  
56 and protection of the paternal genome [3]. While in most mammals, DNA compaction in

57 sperm is accomplished by incorporation of protamine 1 (PRM1) alone, primates and most  
58 rodents express two protamines, PRM1 and protamine 2 (PRM2) [4, 5]. In mice and men,  
59 *Prm1* and *Prm2* are encoded in a tightly regulated gene cluster on chromosome 16 [6, 7].  
60 While PRM1 is expressed as mature protein, PRM2 is expressed as precursor protein (pre-  
61 PRM2), consisting of a C-terminal mature PRM2 (mPRM2) domain and a N-terminal cleaved  
62 PRM2 (cPRM2) domain, which is sequentially cleaved off upon binding to DNA [5, 8, 9]. Of  
63 note, *mPrm2* is proposed to originate from a gene duplication of *Prm1* [10]. In an  
64 evolutionary context *Prm1* and *cPrm2* were shown to be conserved, suggesting important  
65 roles in fertility [11, 12]. *PRM1/PRM1* and *PRM2/PRM2* are detected in a species-specific  
66 ratio (humans 1:1 ([13]), mice 1:2 [14]). In humans, alterations of the protamine ratio  
67 (PRM1:PRM2) have been associated with male sub- and infertility [15-27].  
68 Mice chimeric for a deletion of one allele of *Prm1* or *Prm2* [28-30] were infertile and did not  
69 allow for the establishment of mouse lines and detailed analysis of *Prm*-deficiency. Further,  
70 heterozygous *Prm1*-deficient mice generated with CRISPR-Cas9 have been reported to be  
71 infertile [31]. Hence, a detailed phenotypical analysis of *Prm1*-deficient mice was not possible  
72 so far.  
73 Schneider *et al.* reported the establishment of *Prm2*-deficient mouse lines using CRISPR-  
74 Cas9-mediated gene editing in zygotes [32]. Here, *Prm2*<sup>+/-</sup> male mice remained fertile while  
75 *Prm2*<sup>-/-</sup> were infertile. While *Prm2*<sup>+/-</sup> sperm showed no pathomorphological effects, *Prm2*<sup>-/-</sup>  
76 sperm presented with fragmented DNA, disrupted sperm membranes and complete  
77 immotility. These defects were shown to accumulate during epididymal transit. It was  
78 demonstrated that the *Prm2*<sup>-/-</sup> mice display a deregulation of proteins leading to an  
79 accumulation of reactive oxygen species (ROS) explaining the phenotype observed [33].  
80 Using CRISPR-Cas9-mediated gene-editing in zygotes, we generated mice deficient for  
81 *Prm1*. Male mice heterozygous for the mutation (*Prm1*<sup>+/-</sup>) are subfertile, while *Prm1*-deficient  
82 (*Prm1*<sup>-/-</sup>) males are sterile. Molecular analyses revealed that loss of one allele of *Prm1* leads  
83 to a moderate fragmentation of DNA, while in *Prm1*<sup>-/-</sup> mice complete DNA fragmentation can  
84 be observed. Sperm of *Prm1*<sup>+/-</sup> mice display reduced motility as well as enhanced 8-OHdG

85 levels indicative of upregulated ROS levels. Most importantly, analyses of sperm nuclear  
86 proteins revealed that the processing of PRM2 to its mPRM2 form seems disturbed in  
87 *Prm1*<sup>+/-</sup> animals already. Further, the species-specific protamine ratio is shifted in *Prm1*<sup>+/-</sup>  
88 mice. These data strongly suggest that the species-specific level of PRM1 is required for  
89 proper sperm function.

90

91

## 92 **Material and Methods**

93

### 94 *Ethics statement*

95 All animal experiments were conducted according to the German law of animal protection  
96 and in agreement with the approval of the local institutional animal care committees  
97 (Landesamt für Natur, Umwelt und Verbraucherschutz, North Rhine-Westphalia, approval ID:  
98 AZ84-02.04.2013.A429; AZ81-0204.2018.A369).

99

### 100 *Generation of Prm1-deficient mice*

101 Single guide RNAs (sg1\_ts: 5'-CACCGCGAAGATGTCGCAGACGG; sg1\_bs: 5'-  
102 AAACCCGTCTGCGACATCTTCGC; sg2\_ts: 5'-CACCGTGTATGAGCGGCGGCGA, sg2\_bs:  
103 5'-AAACTCGCCGCCGCTCATACAC) were tested in ES cells as described before [32].  
104 Guides targeted exon 1 and exon 2 of *Prm1*.

105 CRISPR-Cas9-mediated gene editing of zygotes was performed as described before [32]. In  
106 brief, 6-8 weeks old B6D2F1 females were superovulated by intraperitoneal injections of 5  
107 i.u. pregnant mare's serum (PMS) and 5 i.u. human chorionic gonadotropin (hCG). Females  
108 were mated with B6D2F1 males and zygotes were isolated 0.5 dpc. Single guide RNAs (50  
109 ng/μl each) were microinjected together with Cas9 mRNA (100 ng/μl). After culturing in  
110 KSOM medium for three days, developing blastocysts were transferred into the uteri of  
111 pseudo-pregnant CB6F1 foster mice. Offspring was genotyped by PCR and sequenced to  
112 identify founder animals. After first backcrossing to C57BL/6J mice, the F1 generation was

113 sequenced. The allele (NM\_013637.5:c.51\_125del) was further back-crossed to C57BL/6J  
114 mice. Starting from the N3 generation analyses were performed, using male mice aged  
115 between 8-13 weeks.

116

#### 117 *Prm2-deficient mice*

118 *Prm2*-deficient mice (MGI: 5760133; 5770554) generated and analyzed by Schneider *et al.*  
119 [32, 33] were used for comparison.

120

#### 121 *Genotyping and sequencing of mice*

122 Primers flanking the gene edited region (*Prm1*\_fwd: 5'- CCACAGCCCACAAAATTCCAC,  
123 *Prm1*\_rev: 5'- TCGGACGGTGGCATTTCATTTCA) were used to amplify both the WT and edited  
124 allele (Cycling conditions: 2 min 95°C; 30x (30 sec 95°C; 30 sec 64°C; 35 sec 72°C); 5 min  
125 72°C). PCR products (*WT* allele: 437 bp, *Prm1*Δ167: 270 bp) were separated on agarose  
126 gels.

127 PCR products were cloned using the TOPO™ TA Cloning™ Kit with pCR™2.1- TOPO™  
128 (Thermo Fisher) according to the manufacturer's instructions. Plasmids were transformed  
129 into E.cloni ® 10G Chemically Competent Cells (Lucigen, Middleton, WI, USA) according to  
130 the manufacturer's instructions, isolated by alkaline lysis and sequenced by GATC/Eurofins  
131 (Cologne, Germany).

132

#### 133 *Fertility assessment*

134 Fertility was tested by mating male mice 1:1/1:2 to C57BL/6J females. Females were  
135 examined for presence of a vaginal plug daily. Plug positive females were separated and  
136 monitored. Pregnancies and litter sizes were recorded. A minimum of five plugs per male  
137 were evaluated.

138

#### 139 *Immunohistochemistry (IHC)/ Immunofluorescence (IF)*

140 Tissues were fixed in Bouin's solution or paraformaldehyde (PFA) (4°C, overnight)  
141 processed in paraffin and 3 µm sections were generated. After deparaffinization, slides were  
142 treated with decondensation buffer, as described [33]. Heat mediated antigen retrieval was  
143 performed (citrate buffer pH 6.0) for 20 min, followed by blocking in Tris-HCl buffer (pH 7.4,  
144 5% Bovine serum albumin, 0.5% Triton X-100) and primary antibody treatment overnight at  
145 4°C. For IHC staining against protamines (anti-PRM1 (Hup1N) and anti-PRM2 (Hup2B) Briar  
146 Patch Biosciences, Livermore, CA, USA; 1:200), slides were treated with 3 % H<sub>2</sub>O<sub>2</sub> for 30  
147 min after decondensation. Biotinylated goat-anti-mouse (Dako, Glostrup, Denmark; E0433;  
148 1:200) was used as secondary antibody (1 h, RT), processed using Vectastain Elite ABC-  
149 HRP Kit (Vector Laboratories, Burlingame, CA, USA; PK-6100) and stained with AEC-  
150 solution (Dako, AEC+ Substrate, K3469). Counterstain was performed using hematoxylin.  
151 For IF against 8-OHdG (Santa Cruz Biotechnology, Dallas, TX, USA; sc-66036; 1:200), goat-  
152 anti-mouse Alexa Fluor 488 (Thermo Fisher; A-11001; 1:500) was used as secondary  
153 antibody for 2 h at room temperature. Nuclei were stained using 1 µg/ml Hoechst (Thermo  
154 Fisher; 33342). 8-OHdG positive sperm were quantified using the Photoshop® counting tool.  
155 Two tubuli cross-sections per organ per mouse for three animals per genotype were  
156 analyzed.

157

#### 158 *Macroscopic analysis of testis*

159 Sections of Bouin-fixed testis were deparaffinized, hydrated, stained with Hemalum solution  
160 acid (Mayer) and Eosin Y solution (Carl Roth, Karlsruhe, Germany), dehydrated and  
161 mounted with Entellan® (Sigma-Aldrich/Merck, Darmstadt, Germany). Tubule diameters  
162 were determined measuring the horizontal and vertical diameters of at least 25 tubuli per  
163 testis cross-section. The number of elongated spermatids per tubules for a minimum of 5  
164 tubules per mouse was counted with the ImageJ cell counter.

165

#### 166 *Periodic Acid Schiff (PAS) Staining*

167 PAS staining was performed as described [33]. After deparaffinization and re-hydration slides  
168 were incubated for 10 min in periodic acid (0.5%), rinsed in H<sub>2</sub>O, incubated 20 min with Schiff  
169 reagent, counterstained and mounted.

170

#### 171 *Isolation of epididymal sperm*

172 Sperm were isolated from the cauda epididymis by swim-out as described [32]. The  
173 epididymal tissue was incised multiple times and incubated in M2 medium (Sigma) or PBS at  
174 37°C for 15-30 min.

175

#### 176 *Transmission electron microscopy*

177 Isolated sperm were pelleted (10,000 g, 2 min), fixed in 3% glutaraldehyde at 4°C overnight,  
178 washed with 0.1 M cacodylate buffer (2x 15 min), post-fixed with 2 % osmium tetroxide at  
179 4°C for 2 h and again washed. After dehydration in an ascending ethanol series and  
180 contrasting in 70% (v/v) ethanol 0.5% (m/v) uranyl acetate (1 – 1.5 h, 4°C), samples were  
181 washed with propylenoxide (3x 10 min, RT) and stored in propylenoxide:Epon C (1:1, (v/v))  
182 at 4°C overnight. Next, the pellets were embedded in Epon C (70 °C, 48 h). Ultra-thin  
183 sections were examined with transmission electron microscope CM10 equipped with  
184 analySiS imaging software. Using ImageJ, 100 sperm per sample were analyzed to  
185 determine the difference between the minimum and maximum grey value. Chromatin  
186 condensation status was categorized according to high (<150), intermediate (150-180) and  
187 low (>180) difference in grey scale.

188

#### 189 *Assessment of sperm DNA integrity*

190 Sperm genomic DNA was isolated as described [34] with minor adjustments. Briefly, sperm  
191 were incubated in 500 µl lysis buffer (1 M Tris-HCl pH 8.0, 3 M NaCl, 0.5 M EDTA, 20% (m/v)  
192 SDS) supplemented with 21 µl 1 M DTT, 2.5 µl 0.5% Triton-X100 and 40 µl 10 mg/ml  
193 proteinase K at 50°C overnight. After centrifugation (15,500 x g, 10 min), 1 µl 20 mg/ml  
194 glycogen and 1/10 vol 3 M NaAc were added to the supernatant. Precipitation was performed

195 using absolute ethanol for 2 h at -80°C followed by 45 min at -20°C. The pellet was washed  
196 with 75% EtOH and dried in a Speed Vac DNA110 (Savant, Farmingdale, USA). DNA was  
197 dissolved in 30 µl TE buffer.

198

#### 199 *Chromomycin A3 (CMA3) staining*

200 Epididymal sperm were fixed in Carnoy's solution (3:1 methanol:acetic acid, (v/v)), spread on  
201 microscopic slides and covered with 100 µl CMA3 solution (0.25 mg/ml CMA3 in McIlvaine  
202 buffer (pH 7.0, containing 10 mM MgCl<sub>2</sub>)). After incubation for 20 min in the dark, slides were  
203 rinsed with McIlvaine buffer and mounted with ROTI®Mount FluorCare DAPI (Carl Roth,  
204 Germany). 400 sperm per mouse were analyzed.

205

#### 206 *Analysis of sperm membrane integrity*

##### 207 *Eosin-Nigrosin staining*

208 50 µl of sperm swim-out and 50 µl Eosin-Nigrosin stain (0.67 g eosin Y (color index 45380),  
209 0.9 g sodium chloride, 10 g nigrosin (color index 50420), 100 ml ddH<sub>2</sub>O) were mixed and  
210 incubated for 30 sec. 30 µl of the mix was pipetted onto microscope slides, smeared and  
211 mounted with Entellan® (Merck, Darmstadt, Germany). 200 sperm per animal were  
212 analyzed.

##### 213 *Hypoosmotic swelling test*

214 100 µl of sperm swim-out was mixed with 1 ml pre-warmed HOS solution (1.375 g D-  
215 fructose, 0.75 g sodium citrate dihydrate, 100 ml ddH<sub>2</sub>O) and incubated for 30 min at 37°C.  
216 The solution was dropped onto a microscopic slide, covered with a cover slip and analyzed  
217 within 1 h. 200 sperm per animal were evaluated.

218

#### 219 *RNA sequencing (RNAseq) and differential expression analysis*

220 RNA was extracted from whole testis of three individuals per genotype. After removal of the  
221 tunica albuginea, testes were homogenized in TRIzol™ and processed according to the  
222 manufacturer's protocol (Thermo Fisher). RNA integrity (RIN) was determined using the RNA



223 Nano 6000 Assay Kit with the Agilent Bioanalyzer 2100 system (Agilent Technologies, Santa  
224 Clara, CA, USA). RIN values were > 7 for all samples. RNA sample quality control, library  
225 preparation (QuantSeq 3'-mRNA Library Prep (Lexogen, Greenland, NH, USA)) and RNAseq  
226 were performed by the University of Bonn Core facility for Next Generation Sequencing  
227 (NGS). Sequencing was performed on the Illumina HiSeq 2500 V4 platform, producing >10  
228 million, 50bp 3'-end reads per sample.

229 Samples were mapped to the mouse genome (GRCm38.89) using HISAT2 2.1 [35] and  
230 transcripts were quantified and annotated using StringTie 1.3.3 [36]. Gene annotation was  
231 retrieved from the Ensembl FTP server (<ftp://ftp.ensembl.org>)(GRCm38.89). The python  
232 script (preDE.py) included in the StringTie package was used to prepare DEseq2-compatible  
233 gene-level count matrices for analysis of differential gene expression. Mapping to the *Prm1*  
234 genomic location was visualized using the Integrative Genomics Viewer (IGV) [37].

235 Differential expression was analyzed using DESeq2 1.16.1 [38]. The adjusted p-value  
236 (Benjamini-Hochberg method) cutoff for DE was set at < 0.05, log2 fold change of expression  
237 (LFC) cutoff was set at > 1. We performed GO term and pathway overrepresentation  
238 analyses on relevant lists of genes using the PANTHER gene list analysis tool with Fisher's  
239 exact test and FDR correction [39].

240

#### 241 *Mass spectrometry and differential protein abundance analysis*

242 Sperm basic nuclear proteins from three WT, *Prm1*<sup>-/-</sup> and *Prm2*<sup>-/-</sup> mice were isolated as  
243 described below and used for mass spectrometric analysis. Peptide preparation, LC-MS and  
244 differential abundance (DA) analysis were performed at the University of Bonn Core facility  
245 Mass Spectrometry.

246 Peptide preparation: Protein solutions (5.5 M urea, 20% 2-mercaptoethanol, 5% acetic acid)  
247 were dried in a vacuum concentrator and subjected to in solution preparation of peptides as  
248 described previously [40]. Briefly, cysteines were alkylated with acrylamide and digested with  
249 trypsin, followed by desalting.

250 LC-MS measurements were performed according to Arévalo *et al.* [40]. Briefly, peptides were  
251 separated on a self-packed reversed-phase column within a 90 min gradient. Peptide ions  
252 were analyzed with an Orbitrap Lumos mass spectrometer in data-dependent mode with a  
253 top-speed method. Precursors and fragment ions were recorded with the Orbitrap detector.  
254 Raw data processing and was performed with Proteome Discoverer software in combination  
255 with Mascot server version 2.6.1 using *Mus musculus* sequences from SwissProt (2021/03,  
256 including isoforms), and contaminants (cRAP, [41]). Mascot results were filtered for 1% FDR  
257 on the basis of q-values from the percolator algorithm [42]. Spectra with identifications below  
258 1% q-value were sent to a second round of database search with semi-tryptic enzyme  
259 specificity Summed abundances were used for relative quantification.

260 Differential abundance (DA) analysis: DA analysis was performed using the Bioconductor  
261 package proDA [43] using peptide spectrum matches (PSM) level data extracted from  
262 Protein Discoverer. Only proteins detected in all genotypes and all replicates with more than  
263 two peptides were included in the analysis. The data were log<sub>2</sub> transformed and median  
264 normalized prior to DA analysis to ensure comparability. The proDA package is based on  
265 linear models and utilized Bayesian priors to increase power for differential abundance  
266 detection [43]. Proteins with a log<sub>2</sub> fold change (LFC) of >1 and false discovery rate adjusted  
267 p-value (FDR) <0.05 were considered differentially abundant compared to the WT. Plots  
268 were generated using the R-package ggplot2 [44].

269

#### 270 *Sperm nuclear morphology analysis*

271 Epididymal sperm were analyzed using the ImageJ plugin  
272 “Nuclear\_Morphology\_Analysis\_1.18.1\_standalone” [45] as described previously [33]. In  
273 brief, sperm were fixed in Carnoys solution (3:1 methanol: acetic acid (v/v)), spread on  
274 slides, mounted with ROTI®Mount FluorCare DAPI (Carl Roth, Karlsruhe, Germany) and  
275 imaged at 100-fold magnification. A minimum of 100 sperm heads per sample from four  
276 biological replicates were analyzed.

277

278 *Sperm motility analysis*

279 Epididymal sperm swim out was performed in 1 ml sterile filtered THY medium (138 mM  
280 NaCl, 4.8 mM KCl, 2 mM CaCl<sub>2</sub>, 1.2 mM KH<sub>2</sub>PO<sub>4</sub>, 1 mM MgSO<sub>4</sub>, 5.6 mM glucose, 10 mM  
281 HEPES,  
282 0.5 mM sodium pyruvate, 10 mM L-lactate, pH 7.4, 310-320 mOsm) for 15 min at 37°C. Next,  
283 sperm were diluted 1:20 – 1:50 in dilution medium (3 mg/ml BSA in THY medium). 30 µl of  
284 dilution were pipetted onto a glass slide equipped with a spacer and cover slip, placed on a  
285 heated slide holder (37°C) and analyzed under an inverted microscope (Leica, Wetzlar,  
286 Germany) equipped with a camera (acA1920-155ucMED; Basler AG, Ahrensburg,  
287 Germany). The movement of sperm was recorded at 100 frames/sec for 3 sec and analyzed  
288 in ImageJ. The produced “z project” was used to distinguish and count moving and non-  
289 moving sperm (n = 100 sperm/ mouse).

290

291 *Analysis of sperm basic nuclear proteins*

292 Isolation of sperm nuclear proteins was performed according to Soler-Ventura *et al.* [46].  
293 Briefly, sperm were counted, washed in PBS, pelleted and resuspended in 200 µl buffer  
294 containing 4 µl 1 M Tris pH8, 0.8 µl 0.5 M MgCl<sub>2</sub> and 5 µl Triton X-100. After centrifugation  
295 the pellet was mixed with 1 mM PMSF. Lysed cells were mixed with solutions containing  
296 PMSF, EDTA, DTT, GuHCl and vinylpyridine and incubated for 30 min at 37°C. Addition of  
297 EtOH precipitates DNA. Proteins are dissolved in 0.5 M HCl and precipitated with TCA. After  
298 acetone washes the proteins are lyophilized and resuspended in sample buffer (5.5 M Urea,  
299 20% 2-mercaptoethanol, 5% acetic acid).

300 Next, the nuclear proteins were separated on a pre-electrophorized 15% acid-urea  
301 polyacrylamide gel (2.5 M urea, 0.9 M acetic acid, and 15% acrylamide/ 0.1% N,N'-  
302 Methylene bis-acrylamide, TEMED and APS) and visualized with Coomassie Brilliant Blue.  
303 Quantification was performed utilizing ImageJ as described previously [40].

304

305 *Statistics*

306 Values are, if not indicated otherwise, presented as mean values with standard deviation.  
307 Statistical significance was calculated by two-tailed, unpaired Student's t-test and a value of  
308  $p < 0.05$  was considered significant ( $p < 0.05 = *$ ;  $p < 0.005 = **$ ;  $p < 0.001 = ***$ ).

309

310

## 311 **Results**

312

### 313 *CRISPR-Cas9-mediated gene editing produces Prm1-deficient mice*

314 *Prm1*-deficient mice were generated using CRISPR-Cas9-mediated gene editing. Guide  
315 RNAs targeting exon 1 and exon 2 of *Prm1* and Cas9 mRNA were injected into zygotes.  
316 From the 13 pups obtained four contained a deletion in the *Prm1* coding region. Those  
317 animals were mated to C57BL/6J mice and from the offspring the *Prm1* locus was  
318 sequenced. We selected a mouse carrying a 167 bp in frame deletion in the *Prm1* coding  
319 region (**Fig. 1a**) and established a PCR-based genotyping (**Fig. 1b**).

320 In order to validate the deletion, 3'-mRNA sequencing of whole testis of WT (*Prm1*<sup>+/+</sup>) and  
321 *Prm1*<sup>-/-</sup> males was performed. In *Prm1*<sup>-/-</sup> males the transcripts mapped to the 5' and the  
322 3' ends of the *Prm1* locus while we could not detect transcripts from the central, deleted  
323 area, which encodes for crucial arginine sites required for DNA binding (**Fig. 1a**,  
324 **Supplementary Fig. 1**).

325 Next, we used immunohistochemical (IHC) staining with an anti-PRM1 antibody, targeting an  
326 epitope at the N-terminus of PRM1 (marked in red (**Fig. 1a**)) in order to determine, whether  
327 the potential transcripts of the gene-edited allele result in the production of a truncated PRM1  
328 protein. However, we could not detect a signal in testis sections of *Prm1*<sup>-/-</sup> males (**Fig. 1c**).  
329 This strongly suggests nonsense mediated RNA decay of the potential transcript and  
330 demonstrates, that the deletion introduced by CRISPR-Cas9 results in a functional *Prm1* null  
331 allele. PRM1 was detected in elongating spermatids and spermatozoa in wildtype (*Prm1*<sup>+/+</sup>)  
332 and *Prm1*<sup>+/-</sup> testis sections. PRM2 was present in all genotypes.

333 Mating of *Prm1*<sup>+/-</sup> males with *Prm1*<sup>+/-</sup> females produced approximately 50% *Prm1*<sup>+/-</sup> and  
334 25% *Prm1*<sup>+/+</sup> or *Prm1*<sup>-/-</sup> animals respectively (**Fig. 1d**), suggesting that the deletion did not  
335 interfere with embryonic development.

336

337 *Prm1*<sup>-/-</sup> male mice are infertile, while *Prm1*<sup>+/-</sup> are subfertile

338 After establishing and validating the *Prm1*-deficient line, we performed fertility tests with  
339 *Prm1*<sup>+/-</sup> and *Prm1*<sup>-/-</sup> males. *Prm1*<sup>+/-</sup> males are subfertile, while *Prm1*<sup>-/-</sup> males are sterile  
340 (**Fig. 1e**). None of the nine *Prm1*<sup>-/-</sup> males tested was able to generate offspring. *Prm1*<sup>+/-</sup>  
341 males generate smaller average litter sizes (mean:  $3.81 \pm 2.75$ ) compared to WT males  
342 (mean:  $6.75 \pm 2.39$ ) (**Fig. 1e**). Additionally, the pregnancy frequency of *Prm1*<sup>+/-</sup> males is  
343 significantly reduced (**Fig. 1f**). Only about 33% of the monitored copulations with *Prm1*<sup>+/-</sup>  
344 males resulted in pregnancies. These results indicate that loss of one allele of *Prm1* already  
345 reduces male mice fecundity.

346

347 *Spermatogenesis unaffected in Prm1-deficient mice*

348 In order to test, whether the deletion of *Prm1* affects spermatogenesis, we analyzed standard  
349 male fertility parameters. The relative testis mass (**Fig. 2a**), the average seminiferous tubuli  
350 diameter (**Fig. 2b**) and the number of elongating spermatids per seminiferous tubule cross  
351 section (**Fig. 2c**) are not reduced in *Prm1*<sup>+/-</sup> or *Prm1*<sup>-/-</sup> animals when compared with  
352 *Prm1*<sup>+/+</sup> animals. Spermatozoa lining up at the lumen of stage VII-VIII seminiferous tubules  
353 can be detected in *Prm1*-deficient mice (**Fig. 2d**). Spermatids undergo differentiation,  
354 elongate and acrosomal structures and flagellae are formed in *Prm1*-deficient mice (**Fig. 2e**).  
355 These results suggest that spermatogenesis is unaffected in *Prm1*<sup>+/-</sup> and *Prm1*<sup>-/-</sup> mice.

356

357 *Epididymal Prm1-deficient sperm display ROS-mediated DNA damage*

358 Since PRM1 is necessary for DNA hypercondensation, we evaluated chromatin compaction  
359 of epididymal sperm. Transmission electron micrographs of epididymal sperm revealed  
360 defects in chromatin hypercondensation in *Prm1*<sup>-/-</sup> sperm compared to *Prm1*<sup>+/-</sup> and *Prm1*<sup>+/+</sup>

361 sperm (**Fig. 3a**). While approximately 80 - 85% of *Prm1*<sup>+/-</sup> and *Prm1*<sup>+/+</sup> epididymal sperm  
362 nuclei appear electron dense indicative for condensed chromatin, only around 29% of *Prm1*<sup>-</sup>  
363 <sup>-</sup> sperm nuclei seem fully condensed (**Fig. 3b**). Additionally, epididymal sperm from *Prm1*<sup>-</sup>  
364 *mice* present with membrane damage and disrupted acrosomes in transmission electron  
365 micrographs (**Fig. 3c**).

366 To assess DNA damage, genomic DNA isolated from epididymal sperm was separated by  
367 agarose gel electrophoresis. DNA from WT sperm presents as a single band of high  
368 molecular weight indicative for intact DNA. Contrary, the majority of DNA isolated from *Prm1*<sup>-</sup>  
369 <sup>-</sup> epididymal sperm is detected as fragments of approximately 100-500 bp indicative of  
370 strong DNA degradation. While DNA of sperm from *Prm2*<sup>-</sup> male mice is completely  
371 fragmented, a small proportion of DNA in *Prm1*<sup>-</sup> sperm is presented as a high molecular  
372 weight band indicating that a small portion of DNA from *Prm1*<sup>-</sup> sperm remains intact. DNA  
373 from *Prm1*<sup>+/-</sup> sperm displays a weak smear indicative for low, but detectable level of DNA-  
374 degradation (**Fig. 3d**). This suggests that loss of one *Prm1* allele leads to low levels of DNA  
375 damage. This is in contrast to *Prm2*, where loss of one allele was tolerated and DNA did not  
376 show any sign of degradation.

377 Since similar DNA damage have been described for *Prm2*<sup>-</sup> sperm and have been  
378 correlated to increased reactive oxygen species (ROS) levels during epididymal transit [32,  
379 33], we stained testicular and epididymal tissue sections for 8-OHdG (8-  
380 hydroxydeoxyguanosine), a marker for oxidative stress induced DNA lesions. In tissue  
381 sections from epididymides of *Prm1*<sup>-</sup> mice, 60% of caput sperm and 64% of cauda sperm  
382 stained 8-OHdG-positive (**Fig. 3e-f**). In epididymides of *Prm1*<sup>+/-</sup> mice a small number of  
383 sperm stained positive for 8-OHdG (mean: 2.6% in caput and 3.0% in cauda epididymis). In  
384 contrast, on sections of *Prm1*<sup>+/+</sup> mice, no staining was detected. This shows, that the low  
385 level of DNA damage detected in *Prm1*<sup>+/-</sup> males is most likely restricted to the few 8-OHdG  
386 positive sperm and not due to low level of DNA damage in all sperm. Of note, the majority of  
387 the sperm from *Prm1*<sup>-</sup> mice stain 8-OHdG-positive in the testis (**Fig. 3f**).

388

389 *Epididymal Prm1-deficient sperm display impaired membrane integrity, nuclear head*  
390 *morphology changes and sperm motility defects*

391 To characterize possible secondary effects of ROS, we next used Eosin-Nigrosin staining  
392 and a hypoosmotic swelling test to test for sperm membrane integrity. *Prm1*<sup>-/-</sup> epididymal  
393 sperm display severe membrane damage indicative of inviable sperm, while no significant  
394 difference between *Prm1*<sup>+/-</sup> and *Prm1*<sup>+/+</sup> sperm was detected (**Fig. 4a, b, Supplementary**  
395 **Fig. 2a, b**).

396 For analysis of epididymal sperm head morphology we used a high-throughput ImageJ  
397 plugin [45] and generated a consensus shape visualizing the overall head shape of the  
398 population analyzed. *Prm1*<sup>-/-</sup> sperm lose the typical hooked sperm head shape (**Fig. 4c,**  
399 **Supplementary Fig. 3a**). While the head shape of *Prm1*<sup>-/-</sup> sperm displays higher variability  
400 (**Supplementary Fig. 3b**), they appear smaller with a mean area of 14.92  $\mu\text{m}^2$  (95% CI  
401  $14.92 \pm 0.26$ ) compared to 19.82  $\mu\text{m}^2$  (95% CI  $19.82 \pm 0.10$ ) and 19.47  $\mu\text{m}^2$  (95% CI  $19.47 \pm$   
402  $0.13$ ) for *Prm1*<sup>+/+</sup> and *Prm1*<sup>+/-</sup> sperm heads, respectively (**Supplementary Fig. 3c**).  
403 Further, *Prm1*<sup>-/-</sup> sperm heads are more elliptic (**Supplementary Fig. 3d**) and thinner  
404 (**Supplementary Fig. 3e**). *Prm1*<sup>+/-</sup> sperm heads show a slightly stronger hook curvature  
405 resulting in a reduced maximum ferret of 8.07  $\mu\text{m}$  (95% CI  $8.07 \pm 0.04$ ) compared to 8.38  
406  $\mu\text{m}$  (95% CI  $8.38 \pm 0.04$ ) for *Prm1*<sup>+/+</sup> sperm (**Supplementary Fig. 3f**). The reduction in  
407 maximum ferret is significant, however, should be interpreted carefully, when considering the  
408 general variability but clear overlap in sperm head shapes depicted for *Prm1*<sup>+/-</sup> and *Prm1*<sup>+/+</sup>  
409 sperm populations (**Supplementary Fig. 3b**). These results suggest, that loss of one allele  
410 of *Prm1* does not affect sperm head shape dramatically.

411 Next, we analyzed the percentage of motile sperm isolated from the cauda epididymis (**Fig.**  
412 **4d**). Strikingly, *Prm1*<sup>+/-</sup> sperm showed a marked reduction in sperm motility. Only around  
413 23% of the *Prm1*<sup>+/-</sup> sperm were motile. In contrast, 77% of WT sperm were motile, while  
414 *Prm1*-deficient sperm are completely immotile. So, the reduction in motility contributes to the  
415 sub/infertility seen.

416

417 *Transcriptional and proteomic profiling reveals differences in Prm1 and Prm2 deficient males*  
418 To address the question, whether transcriptional silencing is affected upon loss of  
419 protamines, we performed transcriptomic and proteomic analyses. 3'-mRNA sequencing of  
420 the whole testis revealed that in *Prm1*<sup>-/-</sup> testis 99 genes are higher and 11 lower expressed,  
421 while in *Prm1*<sup>+/-</sup> testis 28 genes were higher and 39 were lower expressed, both compared  
422 to WT testis (**Fig. 5a, Supplementary Material 1**). In *Prm1*<sup>-/-</sup> testis pathway enrichment for  
423 immune related genes (*Il1b*, *Ccl5*, *Saa3*, *Atp6ap1*, *Rsad2*, *Cxcl10*, *Ifit1*, *Mmp13*, *Clec4e*,  
424 *Zghhc*) was identified. These transcripts were slightly higher abundant in *Prm1*<sup>-/-</sup> testis  
425 compared to WT testis, but showed low levels of expression (**Supplementary Material 1**).  
426 This might either indicate a reaction to ROS-mediated damage of the sperm in testis or an  
427 unspecific failure in transcriptional silencing.  
428 In order to determine whether proteins might be differentially abundant in mature sperm, we  
429 analyzed basic nuclear protein extracts of *Prm1*<sup>+/-</sup>, *Prm1*<sup>-/-</sup>, *Prm2*<sup>-/-</sup> and WT sperm with  
430 MassSpec. In *Prm1*<sup>-/-</sup> samples 31 proteins were differentially abundant compared to WT  
431 sperm (**Fig. 5b, Supplementary Material 2**). Of these, 21 were also differentially abundant  
432 in *Prm2*<sup>-/-</sup> samples. Proteins related to translation, mRNA splicing and protein folding  
433 (EEF1A1, EEF1A2, RPL13, RPL31, SRSF1 and PPIA) were detected to be higher abundant  
434 in *Prm1*<sup>-/-</sup> or *Prm2*<sup>-/-</sup> sperm compared to WT sperm. Additionally, histones (H3F3, H3C)  
435 were found to be higher abundant in *Prm1*<sup>-/-</sup> and *Prm2*<sup>-/-</sup> sperm, indicating increased H3  
436 histone retention. In addition, in *Prm2*<sup>-/-</sup> males also histone H4C was higher abundant. In  
437 *Prm1*<sup>-/-</sup> samples, further proteins were detected to be higher abundant related to translation  
438 and mRNA splicing (RPL8, RPS8, RPL18, RPL24, RPL26, SRSF3, SRSF7). Proteins related  
439 to stress response and apoptosis (B2M, CLU, HSPA2) were also higher abundant in sperm  
440 lacking PRM1 or PRM2. This we expected to be a stress response due to the increased  
441 ROS-mediated sperm damage detected. SMCP and SPESP1, proteins important for sperm  
442 motility and sperm-egg fusion on the other hand are lower abundant in both *Prm1*<sup>-/-</sup> and  
443 *Prm2*<sup>-/-</sup> samples. Only one protein, the ribosomal protein RPL31, which was also identified in  
444 *Prm1*<sup>-/-</sup> and *Prm2*<sup>-/-</sup> samples, was higher abundant in *Prm1*<sup>+/-</sup> sperm nuclear extracts



445 compared to WT sperm. The fact that there is only one non-protamine protein differentially  
446 abundant in *Prm1*<sup>+/-</sup> nuclear extracts, suggests that the *Prm1*<sup>+/-</sup> sperm protein profile is not  
447 causative of the subfertility observed.

448

449 *Protamine and nuclear protein content are altered in protamine deficient epididymal sperm*

450 Next, we analyzed the level of protamination using Chromomycin A3 (CMA3), a dye  
451 competing with protamines to bind CG-rich regions to the minor groove of DNA [47]. While  
452 98% of *Prm1*<sup>+/-</sup> sperm show CMA3 staining, only around 29% of *Prm2*<sup>+/-</sup> sperm showed a  
453 CMA3-signal (**Fig. 6a, b**). These data suggest that chromatin in *Prm1*<sup>+/-</sup> and *Prm2*<sup>+/-</sup> sperm  
454 is either not fully or not correctly protaminated, with the effects being more dramatic in  
455 *Prm1*<sup>+/-</sup> sperm. Of note, sperm from *Prm1*<sup>-/-</sup> and *Prm2*<sup>-/-</sup> mice could not be analyzed due to  
456 the fact that severe DNA fragmentation interfered with the staining procedure.

457 To further analyze the relative protamine content and protamination of epididymal sperm of  
458 *Prm1*<sup>+/-</sup>, *Prm1*<sup>-/-</sup>, *Prm2*<sup>+/-</sup>, *Prm2*<sup>-/-</sup> and WT mice in more detail, basic nuclear proteins were  
459 separated on acid-urea polyacrylamide gels (AU-PAGE). Most interestingly, in sperm from  
460 *Prm1*<sup>+/-</sup> and *Prm1*<sup>-/-</sup> mice PRM2 precursors (pre-PRM2) were detected suggesting  
461 disturbances in processing of PRM2 upon loss of PRM1 (**Fig. 6c**, vermillion box). Further, we  
462 quantified the relative amounts of nuclear proteins within individual samples (**Fig. 6d-g**,  
463 **Supplementary Fig. 3**).

464 In WT epididymal sperm protamines account for around 86% of the total nuclear proteins  
465 (**Fig. 6d**). Interestingly, while the difference in sperm protamine content in *Prm1*<sup>+/-</sup> is not  
466 significant (83%), the protamine content is significantly reduced in sperm from *Prm2*<sup>+/-</sup>  
467 (78%), *Prm1*<sup>-/-</sup> (67%) and *Prm2*<sup>-/-</sup> (67%) mice (**Fig. 6d**). These results might help explaining  
468 the increased histone retention in *Prm1*<sup>-/-</sup> and *Prm2*<sup>-/-</sup> sperm, as detected by MassSpec.

469 While the relative amount of mPRM2 to total protamine is not significantly different in  
470 *Prm1*<sup>+/-</sup> and *Prm2*<sup>+/-</sup> sperm compared to WT (**Fig. 6e**), the total amount of PRM2 (mPRM2 +  
471 pre-PRM2) is significantly higher in *Prm1*<sup>+/-</sup> sperm (83%) only (**Fig. 6f**). Taking these data in  
472 account, in *Prm1*<sup>+/-</sup> sperm the PRM1:PRM2 ratio is shifted to approximately 1:5 while the

473 species-specific protamine ratio of 1:2 is maintained in *Prm2*<sup>+/-</sup> sperm which is comparable  
474 to WT [14]. Consequently, the pre-PRM2 content of total PRM2 is significantly larger in  
475 *Prm1*<sup>+/-</sup> and *Prm1*<sup>-/-</sup> sperm compared to *Prm2*<sup>+/-</sup> sperm (**Fig. 6g**).

476

477

## 478 **Discussion**

479

480 In this study, mice deficient for *Prm1* were generated using CRISPR-Cas9-mediated gene  
481 editing. *Prm1*<sup>-/-</sup> male mice are infertile, while loss of one allele of *Prm1* results in subfertility.  
482 *Prm1*<sup>-/-</sup> sperm show severe DNA fragmentation, high levels of 8-OHdG, destructed  
483 membranes and complete immotility. *Prm1*<sup>+/-</sup> sperm show moderate ROS-induced DNA  
484 damage, reduced sperm motility and a shifted PRM1:PRM2 ratio. *Prm1*<sup>-/-</sup> and *Prm1*<sup>+/-</sup>  
485 sperm contain high levels of incompletely processed PRM2 suggesting that PRM1 is  
486 necessary for correct PRM2 processing.

487 Protamine deficient mouse models have been described and associated with male factor  
488 infertility in previous studies [28-31]. Contrary to previous studies, we show that *Prm1*<sup>+/-</sup>  
489 males are able to produce offspring by natural breeding. *Prm1*-deficient chimeras, that have  
490 been generated by classical gene-targeting techniques, were reported to be sterile [28],  
491 excluding mouse line establishment and detailed studies on *Prm1*-deficiency. Takeda *et al.*  
492 were, however, able to generate viable offspring from *Prm1*<sup>+/-</sup> males by *in vitro* fertilization  
493 (IVF) of zona-free oocytes [30]. Further, Mashiko *et al.* reported that CRISPR-Cas9-mediated  
494 *Prm1*<sup>+/-</sup> mice are infertile, however detailed fertility statistics and phenotypical analysis of  
495 *Prm1*-deficient mice were not performed [31]. Since the *Prm1*<sup>+/-</sup> males produced by us are  
496 subfertile, we were able to generate and analyze *Prm1*<sup>-/-</sup> mice. Takeda *et al.* used a different  
497 mouse strain (C57BL/6J x DBA, backcrossed to CD1) and ES-targeting technology, which  
498 might explain the differences in *Prm1*<sup>+/-</sup> fertility. While Mashiko *et al.* used both the identical  
499 strain (C57BL/6J x DBA, backcrossed to C57BL/6J) and technology, they might not have  
500 performed a sufficiently exhaustive fertility analysis in order to detect subfertility.

501 Spermatogenesis seems unaffected in *Prm1*<sup>-/-</sup> (and *Prm1*<sup>+/-</sup>) mice compared to WT mice.  
502 Similar results were described for *Prm2*<sup>-/-</sup> mice, where spermatogenesis appears normal  
503 [32], epididymal sperm however show severe damage. In *Prm2*<sup>-/-</sup> mice it has been reported  
504 that an oxidative stress-mediated destruction cascade is initiated during epididymal sperm  
505 maturation [32, 33]. While it is well known that low levels of ROS are required for proper  
506 sperm function, high levels cause sperm pathologies [48]. Accumulation of ROS and loss of  
507 the antioxidant capacity of *Prm2*<sup>-/-</sup> sperm caused severe DNA fragmentation, sperm  
508 immotility and sperm membrane damage. We observe even earlier effects in *Prm1*<sup>-/-</sup> mice  
509 displaying ROS-mediated DNA damage already in the testis subsequently leading to  
510 immotility and disrupted membranes. Thus, loss of *Prm1* renders the ROS system more  
511 fragile at an even earlier stage. Additionally, transcriptional silencing seems impaired in  
512 *Prm1*<sup>-/-</sup> and *Prm2*<sup>-/-</sup> [33] sperm as indicated by differential gene expression analysis in testis.  
513 Further, we detected increased histone retention in *Prm1*<sup>-/-</sup> and *Prm2*<sup>-/-</sup> sperm using  
514 MassSpec. Differential abundance analysis of nuclear proteins in *Prm1*<sup>-/-</sup> and *Prm2*<sup>-/-</sup>  
515 epididymal sperm show proteins related to translation and apoptotic processes consistent  
516 with the secondary effects observed. However, only moderate differences were detected in  
517 *Prm1*<sup>+/-</sup> sperm compared to WT indicating that these changes most likely do not contribute  
518 to the phenotype observed.

519 While *Prm1*<sup>-/-</sup> male mice display a phenocopy of *Prm2*<sup>-/-</sup> male mice, marked differences  
520 were found between heterozygous males. Interestingly, *Prm1*<sup>+/-</sup> males are subfertile  
521 showing a reduction in average litter sizes and lower pregnancy frequencies. Of note,  
522 *Prm2*<sup>+/-</sup> are fertile [32]. This suggests that loss of one allele of *Prm1*, in contrast to loss of  
523 one allele of *Prm2*, cannot be tolerated. Transmission electron micrographs revealed that  
524 DNA of *Prm1*<sup>+/-</sup> sperm appears electron dense suggesting that the chromatin in sperm is  
525 condensed to the same level as *Prm2*<sup>+/-</sup> [32] and WT sperm. This raises the question as to  
526 why *Prm1*<sup>+/-</sup> males are subfertile.

527 We show that a small population of *Prm1*<sup>+/-</sup> epididymal sperm stain 8-OHdG positive. Also,  
528 genomic DNA isolated from *Prm1*<sup>+/-</sup> sperm is partially fragmented. This indicates that some

529 sperm experience DNA damage caused by ROS rather than all sperm bearing some degree  
530 of DNA damage. Surprisingly, however, we did not detect marked differences in chromatin  
531 condensation or membrane integrity between WT and *Prm1*<sup>+/-</sup> sperm. *Prm2*<sup>+/-</sup> sperm did not  
532 show an increase in ROS-mediated DNA damage compared to WT sperm [33]. Thus,  
533 *Prm1*<sup>+/-</sup> sperm seem more sensible or more exposed to oxidative stress mediated damage  
534 compared to *Prm2*<sup>+/-</sup> sperm. This might contribute to the subfertility of *Prm1*<sup>+/-</sup> males.

535 Noteworthy, redox imbalance in sperm has been repeatedly connected not only to sperm  
536 DNA damage, but also reduced sperm motility in men [49]. It has been reported that sperm  
537 mitochondria present a significant source of ROS in defective sperm [50]. In human,  
538 spontaneous production of mitochondrial ROS by defective sperm causes peroxidative  
539 damage to the sperm midpiece leading to reduced sperm motility. One of the major  
540 differences between *Prm1*<sup>+/-</sup> and *Prm2*<sup>+/-</sup> sperm is that loss of one allele of *Prm1* leads to a  
541 marked decrease in sperm motility, whereas *Prm2*<sup>+/-</sup> sperm motility was not significantly  
542 different from WT sperm [32]. Only around 23% of the *Prm1*<sup>+/-</sup> sperm are motile, an amount  
543 that qualifies in human as asthenozoospermic according to the WHO criteria [49, 51, 52].  
544 Since mitochondrial ROS has been negatively correlated to sperm motility and we detect a  
545 moderate increase in ROS in *Prm1*<sup>+/-</sup> sperm compared to WT, we believe that reduced  
546 sperm motility in *Prm1*<sup>+/-</sup> males is (at least partially) caused by ROS, which contributes to  
547 the subfertility observed in *Prm1*<sup>+/-</sup> males.

548 Another notable difference between *Prm1*<sup>+/-</sup> and *Prm2*<sup>+/-</sup> sperm is the aberrant DNA  
549 protamination as revealed by CMA3 staining. While approximately one third of the *Prm2*<sup>+/-</sup>  
550 sperm stain with CMA3, around 98% of *Prm1*<sup>+/-</sup> sperm are CMA3-positive. For human  
551 ejaculates, the percentage of CMA3-positive sperm varies considerably [53] and values of up  
552 to 30% CMA3-positive sperm have been defined for normal semen samples of fertile men  
553 [54, 55]. Thus, we argue that the 29% CMA3-positive sperm seen in *Prm2*<sup>+/-</sup> males, despite  
554 being higher than the values detected in WT controls, can be tolerated and do not affect  
555 regular fertility. However, it is surprising that only 2% of CMA3-negative sperm in *Prm1*<sup>+/-</sup>  
556 mice still result in a partially retained fertility. Enhanced CMA3-staining of sperm is correlated

557 with increased histone retention. Surprisingly, the high CMA3 level in *Prm1*<sup>+/-</sup> sperm could  
558 not be correlated with increased histone retention as shown by MassSpec. One possible  
559 explanation for the intense CMA3 staining in *Prm1*<sup>+/-</sup> sperm could be the vast amounts of  
560 pre-PRM2 detected in nuclear protein extracts from epididymal sperm. We hypothesize that  
561 failure of processing of pre-PRM2 and pre-PRM2 loading onto sperm DNA might allow the  
562 intercalating dye to access DNA and stain the chromatin.

563 Defects in PRM2 processing were also described for histone variant H2A.L.2-KO, transition  
564 protein (TPs)-1 and -2 (TP1/TP2)-double KO, TP2-KO and cleaved PRM2 cP2-KO mouse  
565 models [40, 56-58], all of which display fertility problems. Interestingly, a recent study  
566 showed that mutation of a single non-arginine residue in PRM1 (P1<sup>K49A/K49A</sup>) leads to impaired  
567 PRM2 processing in mice [59]. Of note, *Prm2*<sup>+/-</sup> sperm contain scarce amounts of pre-PRM2  
568 as well. The relative amount of pre-PRM2 is, however, significantly larger in *Prm1*<sup>+/-</sup> sperm.  
569 Hence, species-specific PRM1 levels are required for proper PRM2 processing and  
570 alterations of these levels unequivocally lead to reduced fertility. Noteworthy, presence of  
571 pre-PRM2 in subfertile human sperm has been described before [19].

572 In addition to high levels of pre-PRM2, *Prm1*<sup>+/-</sup> sperm display a shift in the PRM1:PRM2  
573 ratio from approximately 1:2 in WT sperm to 1:5 in *Prm1*<sup>+/-</sup> sperm. Also, in cP2-deficient  
574 mice a shift in the protamine ratio has been described. Arévalo *et al.* have shown that mice  
575 lacking the highly conserved N-terminal part of PRM2, called cleaved PRM2 (cP2), display  
576 defective PRM2 processing and show a PRM1:PRM2 ratio of approx. 5:1 [40]. Mice lacking  
577 cP2 on one allele are infertile. As *Prm1*<sup>+/-</sup> males are subfertile, it appears that a ratio of 1:5  
578 can be tolerated to some extent, whereas a 5:1 ratio is incompatible with fertility. Of note, the  
579 protamine ratio in *Prm2*<sup>+/-</sup> sperm is not significantly different from WT sperm explaining their  
580 regular fertility. In human, alterations of the species-specific ratio both on protein and  
581 transcript level have been repeatedly correlated to male sub- and infertility[15-27]. These  
582 results once again underline the importance of the protamine ratio in species expressing both  
583 protamines.

584 Of note, the protamine ratio in mice harboring a C-terminally altered allele of protamine 1  
585 (P1<sup>K49A/K49A</sup>) was, contrary to the *Prm1*<sup>+/-</sup> sperm analyzed here, unaltered [59]. P1<sup>K49A/K49A</sup>  
586 mice are, like *Prm1*<sup>+/-</sup> mice subfertile. Interestingly, P1<sup>K49A/K49A</sup> sperm show increased  
587 histone retention similar to *Prm1*<sup>-/-</sup> and *Prm2*<sup>-/-</sup> sperm which is not detected in *Prm1*<sup>+/-</sup>  
588 sperm. Thus, the presence of one functional *Prm1* allele is sufficient for proper histone  
589 eviction.

590

591 In summary, we generated and characterized *Prm1*-deficient mice. We demonstrate that  
592 *Prm1*<sup>+/-</sup> mice are subfertile, exhibiting sperm with moderate ROS-induced DNA damage and  
593 reduced motility. Opposed to *Prm2*<sup>+/-</sup> sperm, large amounts of pre-PRM2 were detected in  
594 *Prm1*<sup>+/-</sup> sperm. While the crucial species-specific protamine ratio is maintained in *Prm2*<sup>+/-</sup>  
595 sperm, *Prm1*<sup>+/-</sup> sperm exhibit an aberrant protamine ratio. We demonstrate that *Prm1*<sup>-/-</sup> and  
596 *Prm2*<sup>-/-</sup> mice display impaired transcriptional silencing, increased histone retention and redox  
597 imbalance leading to severe sperm damage, which render males infertile. Loss of *Prm1*  
598 seemingly triggers the ROS system at an even earlier stage compared to loss of *Prm2*. By  
599 intercrossing the *Prm1*-deficient mouse line presented here to our published *Prm2*<sup>+/-</sup> model,  
600 we will next generate and analyze *Prm1*<sup>+/-</sup> *Prm2*<sup>+/-</sup> double heterozygous males, which will  
601 further advance our knowledge about the molecular consequences of disturbances in PRM1  
602 and PRM2 levels and the PRM1:PRM2 ratio.

603

604

## 605 **Acknowledgements**

606 This study was supported by grants from the Deutsche Forschungsgemeinschaft (DFG) to  
607 HS (SCHO 503/23-1), LA (AR 1221/1-1) and KS (STE 892/19-1). We thank Gaby Beine,  
608 Andrea Jäger, Angela Egert, Irina Kosterin, Anna Pehlke, Greta Zech, Barbara Fröhlich and  
609 Tania Bloch for excellent technical assistance. Protein identifications were done at the  
610 University of Bonn Core Facility Mass Spectrometry, Institute of Biochemistry and Molecular  
611 Biology, Medical Faculty, University of Bonn funded by the Deutsche

612 Forschungsgemeinschaft (DFG) – Projektnummer 386936527. We would like to  
613 acknowledge the assistance of the University Bonn Core Facility Next Generation  
614 Sequencing (NGS) for their support.

615

616

#### 617 **Author contributions**

618 G.E.M., K.S., and H.S. conceptualized the study. S.S. generated gene-edited mice. G.E.M.,  
619 J.M., L.A., S.S., A.F. and A.K. analyzed mice. G.E.M. and H.S. drafted the manuscript. All  
620 authors read and approved the final manuscript.

621

622

#### 623 **References**

- 624 1. Rathke C, Baarends WM, Awe S, Renkawitz-Pohl R. Chromatin dynamics during  
625 spermiogenesis. *Biochim Biophys Acta*. 2014;1839(3):155-68. doi:  
626 10.1016/j.bbagr.2013.08.004.
- 627 2. Balhorn R. A model for the structure of chromatin in mammalian sperm. *J Cell Biol*.  
628 1982;93(2):298-305. doi: 10.1083/jcb.93.2.298.
- 629 3. Steger K. Transcriptional and translational regulation of gene expression in haploid  
630 spermatids. *Anat Embryol (Berl)*. 1999;199(6):471-87. doi: 10.1007/s004290050245.
- 631 4. Chauviere M, Martinage A, Debarle M, Sautiere P, Chevaillier P. Molecular  
632 characterization of six intermediate proteins in the processing of mouse protamine P2  
633 precursor. *Eur J Biochem*. 1992;204(2):759-65. doi: 10.1111/j.1432-1033.1992.tb16691.x.
- 634 5. Retief JD, Dixon GH. Evolution of pro-protamine P2 genes in primates. *Eur J Biochem*.  
635 1993;214(2):609-15. doi: 10.1111/j.1432-1033.1993.tb17960.x.

- 636 6. Reeves RH, Gearhart JD, Hecht NB, Yelick P, Johnson P, O'Brien SJ. Mapping of PRM1  
637 to human chromosome 16 and tight linkage of Prm-1 and Prm-2 on mouse chromosome 16.  
638 J Hered. 1989;80(6):442-6. doi: 10.1093/oxfordjournals.jhered.a110895.
- 639 7. Wykes SM, Krawetz SA. Conservation of the PRM1 --> PRM2 --> TNP2 domain. DNA  
640 Seq. 2003;14(5):359-67. doi: 10.1080/10425170310001599453.
- 641 8. Balhorn R. The protamine family of sperm nuclear proteins. Genome Biol.  
642 2007;8(9):227. doi: 10.1186/gb-2007-8-9-227.
- 643 9. Yelick PC, Balhorn R, Johnson PA, Corzett M, Mazrimas JA, Kleene KC, et al. Mouse  
644 protamine 2 is synthesized as a precursor whereas mouse protamine 1 is not. Mol Cell Biol.  
645 1987;7(6):2173-9. doi: 10.1128/mcb.7.6.2173.
- 646 10. Krawetz SA, Dixon GH. Sequence similarities of the protamine genes: implications for  
647 regulation and evolution. J Mol Evol. 1988;27(4):291-7. doi: 10.1007/BF02101190.
- 648 11. Luke L, Tourmente M, Roldan ER. Sexual Selection of Protamine 1 in Mammals. Mol  
649 Biol Evol. 2016;33(1):174-84. doi: 10.1093/molbev/msv209.
- 650 12. Luke L, Tourmente M, Dopazo H, Serra F, Roldan ER. Selective constraints on  
651 protamine 2 in primates and rodents. BMC Evol Biol. 2016;16:21. doi: 10.1186/s12862-016-  
652 0588-1.
- 653 13. de Mateo S, Gazquez C, Guimera M, Balasch J, Meistrich ML, Balleca JL, et al.  
654 Protamine 2 precursors (Pre-P2), protamine 1 to protamine 2 ratio (P1/P2), and assisted  
655 reproduction outcome. Fertil Steril. 2009;91(3):715-22. doi:  
656 10.1016/j.fertnstert.2007.12.047.
- 657 14. Corzett M, Mazrimas J, Balhorn R. Protamine 1: protamine 2 stoichiometry in the  
658 sperm of eutherian mammals. Mol Reprod Dev. 2002;61(4):519-27. doi: 10.1002/mrd.10105.



- 659 15. Aoki VW, Moskovtsev SI, Willis J, Liu L, Mullen JB, Carrell DT. DNA integrity is  
660 compromised in protamine-deficient human sperm. *J Androl.* 2005;26(6):741-8. doi:  
661 10.2164/jandrol.05063.
- 662 16. Balhorn R, Reed S, Tanphaichitr N. Aberrant protamine 1/protamine 2 ratios in sperm  
663 of infertile human males. *Experientia.* 1988;44(1):52-5. doi: 10.1007/BF01960243.
- 664 17. Belokopytova IA, Kostyleva EI, Tomilin AN, Vorob'ev VI. Human male infertility may  
665 be due to a decrease of the protamine P2 content in sperm chromatin. *Mol Reprod Dev.*  
666 1993;34(1):53-7. doi: 10.1002/mrd.1080340109.
- 667 18. Bench G, Corzett MH, de Yebra L, Oliva R, Balhorn R. Protein and DNA contents in  
668 sperm from an infertile human male possessing protamine defects that vary over time. *Mol*  
669 *Reprod Dev.* 1998;50(3):345-53. doi: 10.1002/(SICI)1098-2795(199807)50:3<345::AID-  
670 MRD11>3.0.CO;2-3.
- 671 19. de Yebra L, Balleca JL, Vanrell JA, Corzett M, Balhorn R, Oliva R. Detection of P2  
672 precursors in the sperm cells of infertile patients who have reduced protamine P2 levels.  
673 *Fertil Steril.* 1998;69(4):755-9. doi: 10.1016/s0015-0282(98)00012-0.
- 674 20. Garcia-Peiro A, Martinez-Heredia J, Oliver-Bonet M, Abad C, Amengual MJ, Navarro J,  
675 et al. Protamine 1 to protamine 2 ratio correlates with dynamic aspects of DNA  
676 fragmentation in human sperm. *Fertil Steril.* 2011;95(1):105-9. doi:  
677 10.1016/j.fertnstert.2010.06.053.
- 678 21. Khara KK, Vlad M, Griffiths M, Kennedy CR. Human protamines and male infertility. *J*  
679 *Assist Reprod Genet.* 1997;14(5):282-90. doi: 10.1007/BF02765830.
- 680 22. Ni K, Spiess AN, Schuppe HC, Steger K. The impact of sperm protamine deficiency and  
681 sperm DNA damage on human male fertility: a systematic review and meta-analysis.  
682 *Andrology.* 2016;4(5):789-99. doi: 10.1111/andr.12216.

- 683 23. Oliva R. Protamines and male infertility. *Hum Reprod Update*. 2006;12(4):417-35. doi:  
684 10.1093/humupd/dml009.
- 685 24. Steger K, Failing K, Klönisch T, Behre HM, Manning M, Weidner W, et al. Round  
686 spermatids from infertile men exhibit decreased protamine-1 and -2 mRNA. *Hum Reprod*.  
687 2001;16(4):709-16. doi: 10.1093/humrep/16.4.709.
- 688 25. Steger K, Fink L, Failing K, Bohle RM, Kliesch S, Weidner W, et al. Decreased  
689 protamine-1 transcript levels in testes from infertile men. *Mol Hum Reprod*. 2003;9(6):331-  
690 6. doi: 10.1093/molehr/gag041.
- 691 26. Steger K, Wilhelm J, Konrad L, Stalf T, Greb R, Diemer T, et al. Both protamine-1 to  
692 protamine-2 mRNA ratio and Bcl2 mRNA content in testicular spermatids and ejaculated  
693 spermatozoa discriminate between fertile and infertile men. *Hum Reprod*. 2008;23(1):11-6.  
694 doi: 10.1093/humrep/dem363.
- 695 27. Torregrosa N, Dominguez-Fandos D, Camejo MI, Shirley CR, Meistrich ML, Ballesca JL,  
696 et al. Protamine 2 precursors, protamine 1/protamine 2 ratio, DNA integrity and other sperm  
697 parameters in infertile patients. *Hum Reprod*. 2006;21(8):2084-9. doi:  
698 10.1093/humrep/del114.
- 699 28. Cho C, Willis WD, Goulding EH, Jung-Ha H, Choi YC, Hecht NB, et al.  
700 Haploinsufficiency of protamine-1 or -2 causes infertility in mice. *Nat Genet*. 2001;28(1):82-  
701 6. doi: 10.1038/ng0501-82.
- 702 29. Cho C, Jung-Ha H, Willis WD, Goulding EH, Stein P, Xu Z, et al. Protamine 2 deficiency  
703 leads to sperm DNA damage and embryo death in mice. *Biol Reprod*. 2003;69(1):211-7. doi:  
704 10.1095/biolreprod.102.015115.

- 705 30. Takeda N, Yoshinaga K, Furushima K, Takamune K, Li Z, Abe S, et al. Viable offspring  
706 obtained from Prm1-deficient sperm in mice. *Sci Rep.* 2016;6:27409. doi:  
707 10.1038/srep27409.
- 708 31. Mashiko D, Fujihara Y, Satouh Y, Miyata H, Isotani A, Ikawa M. Generation of mutant  
709 mice by pronuclear injection of circular plasmid expressing Cas9 and single guided RNA. *Sci*  
710 *Rep.* 2013;3:3355. doi: 10.1038/srep03355.
- 711 32. Schneider S, Balbach M, Jan FJ, Fietz D, Nettersheim D, Jostes S, et al. Re-visiting the  
712 Protamine-2 locus: deletion, but not haploinsufficiency, renders male mice infertile. *Sci Rep.*  
713 2016;6:36764. doi: 10.1038/srep36764.
- 714 33. Schneider S, Shakeri F, Trotschel C, Arevalo L, Kruse A, Bunes A, et al. Protamine-2  
715 Deficiency Initiates a Reactive Oxygen Species (ROS)-Mediated Destruction Cascade during  
716 Epididymal Sperm Maturation in Mice. *Cells.* 2020;9(8). doi: 10.3390/cells9081789.
- 717 34. Weyrich A. Preparation of genomic DNA from mammalian sperm. *Curr Protoc Mol*  
718 *Biol.* 2012;Chapter 2:Unit 2 13 1-3. doi: 10.1002/0471142727.mb0213s98.
- 719 35. Kim D, Langmead B, Salzberg SL. HISAT: a fast spliced aligner with low memory  
720 requirements. *Nat Methods.* 2015;12(4):357-60. doi: 10.1038/nmeth.3317.
- 721 36. Pertea M, Pertea GM, Antonescu CM, Chang TC, Mendell JT, Salzberg SL. StringTie  
722 enables improved reconstruction of a transcriptome from RNA-seq reads. *Nat Biotechnol.*  
723 2015;33(3):290-5. doi: 10.1038/nbt.3122.
- 724 37. Robinson JT, Thorvaldsdottir H, Winckler W, Guttman M, Lander ES, Getz G, et al.  
725 Integrative genomics viewer. *Nat Biotechnol.* 2011;29(1):24-6. doi: 10.1038/nbt.1754.
- 726 38. Love MI, Huber W, Anders S. Moderated estimation of fold change and dispersion for  
727 RNA-seq data with DESeq2. *Genome Biol.* 2014;15(12):550. doi: 10.1186/s13059-014-0550-  
728 8.

- 729 39. Mi H, Huang X, Muruganujan A, Tang H, Mills C, Kang D, et al. PANTHER version 11:  
730 expanded annotation data from Gene Ontology and Reactome pathways, and data analysis  
731 tool enhancements. *Nucleic Acids Res.* 2017;45(D1):D183-D9. doi: 10.1093/nar/gkw1138.
- 732 40. Arévalo L, Merges GE, Schneider S, Oben FE, Neumann I, Schorle H. Loss of the  
733 cleaved-protamine 2 domain leads to incomplete histone-to-protamine exchange and  
734 infertility in mice. *Biorxiv.* 2021. doi: 10.1101/2021.09.29.462440.
- 735 41. Mellacheruvu D, Wright Z, Couzens AL, Lambert JP, St-Denis NA, Li T, et al. The  
736 CRAPome: a contaminant repository for affinity purification-mass spectrometry data. *Nat*  
737 *Methods.* 2013;10(8):730-6. doi: 10.1038/nmeth.2557.
- 738 42. Kall L, Storey JD, MacCoss MJ, Noble WS. Assigning significance to peptides identified  
739 by tandem mass spectrometry using decoy databases. *J Proteome Res.* 2008;7(1):29-34. doi:  
740 10.1021/pr700600n.
- 741 43. Ahlmann-Eltze C, Anders S. proDA: Probabilistic dropout analysis for identifying  
742 differentially abundant proteins in label-free mass spectrometry. *Biorxiv.* 2021.
- 743 44. Wickham H. *ggplot2*. Wiley Interdisciplinary Reviews: Computational Statistics. 2011.
- 744 45. Skinner BM, Rathje CC, Bacon J, Johnson EEP, Larson EL, Kopania EEK, et al. A high-  
745 throughput method for unbiased quantitation and categorization of nuclear  
746 morphologydagger. *Biol Reprod.* 2019;100(5):1250-60. doi: 10.1093/biolre/ioz013.
- 747 46. Soler-Ventura A, Castillo J, de la Iglesia A, Jodar M, Barrachina F, Balleca JL, et al.  
748 Mammalian Sperm Protamine Extraction and Analysis: A Step-By-Step Detailed Protocol and  
749 Brief Review of Protamine Alterations. *Protein Pept Lett.* 2018;25(5):424-33. doi:  
750 10.2174/0929866525666180412155205.
- 751 47. Sadeghi S, Talebi AR, Shahedi A, Moein MR, Abbasi-Sarcheshmeh A. Effects of  
752 Tamoxifen on DNA Integrity in Mice. *J Reprod Infertil.* 2019;20(1):10-5.

- 753 48. de Lamirande E, Jiang H, Zini A, Kodama H, Gagnon C. Reactive oxygen species and  
754 sperm physiology. *Rev Reprod.* 1997;2(1):48-54. doi: 10.1530/ror.0.0020048.
- 755 49. Alahmar AT. Role of Oxidative Stress in Male Infertility: An Updated Review. *J Hum*  
756 *Reprod Sci.* 2019;12(1):4-18. doi: 10.4103/jhrs.JHRS\_150\_18.
- 757 50. Koppers AJ, De Iulii GN, Finnie JM, McLaughlin EA, Aitken RJ. Significance of  
758 mitochondrial reactive oxygen species in the generation of oxidative stress in spermatozoa. *J*  
759 *Clin Endocrinol Metab.* 2008;93(8):3199-207. doi: 10.1210/jc.2007-2616.
- 760 51. Cooper TG, Noonan E, von Eckardstein S, Auger J, Baker HW, Behre HM, et al. World  
761 Health Organization reference values for human semen characteristics. *Hum Reprod Update.*  
762 2010;16(3):231-45. doi: 10.1093/humupd/dmp048.
- 763 52. WHO laboratory manual for the examination and processing of human semen [press  
764 release]. Geneva: World Health Organization 2010.
- 765 53. Lolis D, Georgiou I, Syrrou M, Zikopoulos K, Konstantelli M, Messinis I. Chromomycin  
766 A3-staining as an indicator of protamine deficiency and fertilization. *Int J Androl.*  
767 1996;19(1):23-7. doi: 10.1111/j.1365-2605.1996.tb00429.x.
- 768 54. Sakkas D, Urner F, Bianchi PG, Bizzaro D, Wagner I, Jaquenoud N, et al. Sperm  
769 chromatin anomalies can influence decondensation after intracytoplasmic sperm injection.  
770 *Hum Reprod.* 1996;11(4):837-43. doi: 10.1093/oxfordjournals.humrep.a019263.
- 771 55. Zandemami M, Qujeq D, Akhondi MM, Kamali K, Raygani M, Lakpour N, et al.  
772 Correlation of CMA3 Staining with Sperm Quality and Protamine Deficiency. *Lab Med.*  
773 2012;43. doi: 10.1309/LMB42F9QXYKFLJNG.
- 774 56. Zhao M, Shirley CR, Yu YE, Mohapatra B, Zhang Y, Unni E, et al. Targeted disruption of  
775 the transition protein 2 gene affects sperm chromatin structure and reduces fertility in mice.  
776 *Mol Cell Biol.* 2001;21(21):7243-55. doi: 10.1128/MCB.21.21.7243-7255.2001.

- 777 57. Barral S, Morozumi Y, Tanaka H, Montellier E, Govin J, de Dieuleveult M, et al.  
778 Histone Variant H2A.L.2 Guides Transition Protein-Dependent Protamine Assembly in Male  
779 Germ Cells. *Mol Cell*. 2017;66(1):89-101 e8. doi: 10.1016/j.molcel.2017.02.025.
- 780 58. Shirley CR, Hayashi S, Mounsey S, Yanagimachi R, Meistrich ML. Abnormalities and  
781 reduced reproductive potential of sperm from Tnp1- and Tnp2-null double mutant mice. *Biol*  
782 *Reprod*. 2004;71(4):1220-9. doi: 10.1095/biolreprod.104.029363.
- 783 59. Moritz L, Schon SB, Rabbani M, Sheng Y, Pendlebury DF, Agrawal R, et al. Single  
784 residue substitution in protamine 1 disrupts sperm genome packaging and embryonic  
785 development in mice. *bioRxiv*. 2021. doi: 10.1101/2021.09.16.460631.
- 786

787 **Figure Legends**

788

789 **Fig.1. Establishment of *Prm1*-deficient mice and fertility analysis.** (a) Graphical  
790 representation of CRISPR-Cas9-mediated gene editing of the *Prm1* locus. Two guide RNAs  
791 were used (indicated by black arrow heads); targeting the *Prm1* coding sequence in exon 1  
792 and exon 2, respectively. A 167 bp in-frame deletion was generated, leading to loss of crucial  
793 arginine-rich DNA binding sites (marked in blue). The epitope of the anti-PRM1 antibody  
794 used in Fig.1c is marked in red. (b) Agarose gel of genotyping polymerase chain reaction of  
795 *Prm1*<sup>+/+</sup>, *Prm1*<sup>+/-</sup> and *Prm1*<sup>-/-</sup> mice. Amplification of the wild type *Prm1* or the *Prm1*<sup>-</sup> allele  
796 generates products of 437 bp or 270 bp, respectively. L = ladder (c) Immunohistochemical  
797 staining against PRM1 and PRM2 on Bouin-fixed, paraffin-embedded testis sections of  
798 *Prm1*<sup>+/+</sup>, *Prm1*<sup>+/-</sup> and *Prm1*<sup>-/-</sup> mice counterstained with hematoxylin. Scale: 50 μm (d)  
799 Mendelian distribution of genotypes (n = 10 litters) from crossings of *Prm1*<sup>+/-</sup> males and  
800 females. (e) Scatter plot of litter sizes monitored after mating with female WT C57BL/6J  
801 mice. n = number of pregnancies produced by 12 *Prm1*<sup>+/+</sup>, 9 *Prm1*<sup>+/-</sup> and 9 *Prm1*<sup>-/-</sup> males,  
802 respectively. The mean litter size is indicated by vermillion lines. (f) Pregnancy frequency (%)  
803 after mating with female WT C57BL/6J mice. n = number of plugs produced by 12 *Prm1*<sup>+/+</sup>,  
804 9 *Prm1*<sup>+/-</sup> and 9 *Prm1*<sup>-/-</sup> males, respectively.

805

806 **Fig.2. Spermatogenesis of *Prm1*-deficient mice.** (a) Testis to body weight ratio of  
807 *Prm1*<sup>+/+</sup>, *Prm1*<sup>+/-</sup> and *Prm1*<sup>-/-</sup> males (n = 8-10). (b) Average diameter of seminiferous  
808 tubules of *Prm1*<sup>+/+</sup>, *Prm1*<sup>+/-</sup> and *Prm1*<sup>-/-</sup> mice (n = 4). 25 tubules per mouse were  
809 evaluated. (c) Quantification of elongating spermatids per seminiferous tubule cross-section  
810 in *Prm1*<sup>+/+</sup>, *Prm1*<sup>+/-</sup> and *Prm1*<sup>-/-</sup> males (n = 3). 5 tubules per mouse were evaluated. (d)  
811 Hematoxylin-Eosin staining of testis of *Prm1*<sup>+/+</sup>, *Prm1*<sup>+/-</sup> and *Prm1*<sup>-/-</sup> males. Tubules at  
812 stage VII-VIII of the epithelial cycle with spermatozoa lining up at the edge of tubule lumen  
813 are marked with asterisks. Scale: 50 μm (e) Periodic acid Schiff staining of testis of *Prm1*<sup>+/+</sup>,

814 *Prm1*<sup>+/-</sup> and *Prm1*<sup>-/-</sup> males. Acrosomal structures are indicated by vermillion arrow heads.

815 Scale: 50  $\mu$ m

816

817 **Fig.3. Analysis of chromatin condensation and ROS-induced DNA damage in**

818 **epididymal *Prm1*-deficient sperm. (a)** Representative transmission electron micrographs of

819 *Prm1*<sup>+/+</sup>, *Prm1*<sup>+/-</sup> and *Prm1*<sup>-/-</sup> epididymal sperm. Scale: 2  $\mu$ m **(b)** Quantification of DNA

820 condensation of epididymal sperm from *Prm1*<sup>+/+</sup>, *Prm1*<sup>+/-</sup> and *Prm1*<sup>-/-</sup> males (n = 3). 100

821 sperm per male were analyzed. **(c)** Transmission electron micrograph of *Prm1*<sup>-/-</sup> epididymal

822 sperm. Scale: 2  $\mu$ m **(d)** Agarose gel loaded with genomic DNA isolated from epididymal

823 sperm of *Prm1*<sup>+/+</sup>, *Prm1*<sup>-/-</sup>, *Prm2*<sup>+/-</sup>, *Prm2*<sup>-/-</sup> and WT males separated by electrophoresis. L

824 = ladder **(e)** Percentage of 8-OHdG positive sperm on tissue sections of caput and cauda

825 epididymis of *Prm1*<sup>+/+</sup>, *Prm1*<sup>+/-</sup> and *Prm1*<sup>-/-</sup> mice (n =3). **(f)** Representative

826 immunofluorescent staining against 8-OHdG in testis, caput epididymis and cauda

827 epididymis tissue sections from *Prm1*<sup>+/+</sup>, *Prm1*<sup>+/-</sup> and *Prm1*<sup>-/-</sup> males. Scale: 50  $\mu$ m

828

829 **Fig.4. Secondary effects on *Prm1*-deficient epididymal sperm. (a)** Eosin-Nigrosin (EN)

830 staining: Quantification of EN positive and EN negative sperm (%) from *Prm1*<sup>+/+</sup>, *Prm1*<sup>+/-</sup>

831 and *Prm1*<sup>-/-</sup> males. (n = 5) **(b)** Hyperosmotic swelling test: Quantification of HOS positive

832 and HOS negative sperm (%) from *Prm1*<sup>+/+</sup>, *Prm1*<sup>+/-</sup> and *Prm1*<sup>-/-</sup> males (n =3). **(c)** Nuclear

833 head morphology analysis for *Prm1*<sup>+/+</sup>, *Prm1*<sup>+/-</sup> and *Prm1*<sup>-/-</sup> sperm. Consensus shapes of

834 sperm heads are depicted. 4 males per genotype and a minimum of 100 sperm per animal

835 were analyzed. **(d)** Quantification of motile and immotile sperm (%) from *Prm1*<sup>+/+</sup>, *Prm1*<sup>+/-</sup>

836 and *Prm1*<sup>-/-</sup> males (n = 3).

837

838 **Fig.5. Differentially expressed genes in the testis and altered protein abundances in**

839 **sperm in protamine-deficient males. (a)** Number of differentially expressed genes

840 subdivided into higher and lower expressed genes in testis of *Prm1*<sup>+/-</sup> and *Prm1*<sup>-/-</sup> males

841 compared to WT males, respectively. **(b)** Venn diagram illustrating changes in abundances



842 of proteins from sperm nuclear protein extractions of *Prm1*<sup>-/-</sup>, *Prm1*<sup>+/-</sup> and *Prm2*<sup>-/-</sup> males  
843 compared to WT, respectively. Proteins that were higher abundant are depicted in bold  
844 letters. Non-bold proteins were lower abundant compared to WT.

845

846 **Fig.6. Sperm nuclear protein analysis in protamine-deficient sperm. (a)** Representative  
847 pictures of CMA3 staining of *Prm1*<sup>+/+</sup>, *Prm1*<sup>+/-</sup> and *Prm2*<sup>+/-</sup> epididymal sperm heads taken  
848 at same exposure time. DAPI was used as counter stain. Scale: 20 μm. **(b)** Average  
849 percentage of CMA3 positive and negative sperm in *Prm1*<sup>+/-</sup>, *Prm2*<sup>+/-</sup> and WT males (n = 3).  
850 A minimum of 400 sperm per male were analyzed. **(c)** Representative acid-urea  
851 polyacrylamide gel (AU-PAGE) of nuclear protein extractions from WT, *Prm1*<sup>+/-</sup>, *Prm1*<sup>-/-</sup>,  
852 *Prm2*<sup>+/-</sup> and *Prm2*<sup>-/-</sup> epididymal sperm. Non-protamine nuclear proteins can be detected at  
853 the top of the AU-PAGE. PRM1 and PRM2 run at the bottom of the gel. PRM2 precursor  
854 forms (pre-PRM2) run higher than PRM (marked by vermilion box). **(d)** Percentage of PRM  
855 of total nuclear protein in nuclear protein extractions from WT, *Prm1*<sup>+/-</sup>, *Prm1*<sup>-/-</sup>, *Prm2*<sup>+/-</sup> and  
856 *Prm2*<sup>-/-</sup> epididymal sperm. **(e)** Percentage of mPRM2 of PRM in nuclear protein extractions  
857 from WT, *Prm1*<sup>+/-</sup> and *Prm2*<sup>+/-</sup> epididymal sperm. **(f)** Percentage of total PRM2 (including  
858 pre-PRM2) of PRM in nuclear protein extractions from WT, *Prm1*<sup>+/-</sup> and *Prm2*<sup>+/-</sup> epididymal  
859 sperm. **(g)** Percentage of pre-PRM2 of PRM2 in nuclear protein extractions from *Prm1*<sup>+/-</sup>,  
860 *Prm1*<sup>-/-</sup> and *Prm2*<sup>+/-</sup> epididymal sperm.

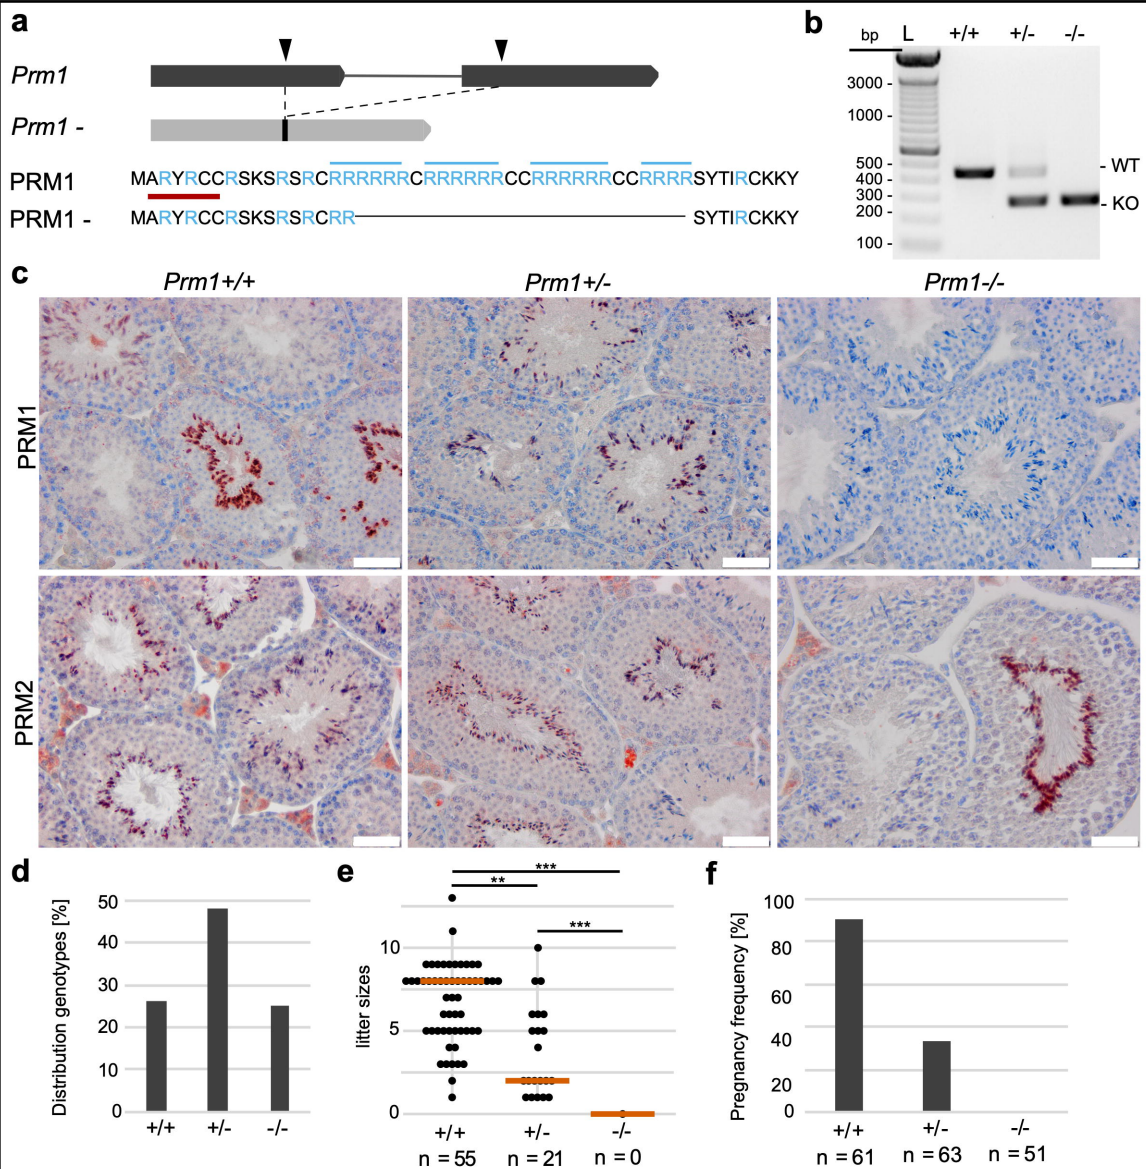

**Fig. 1**

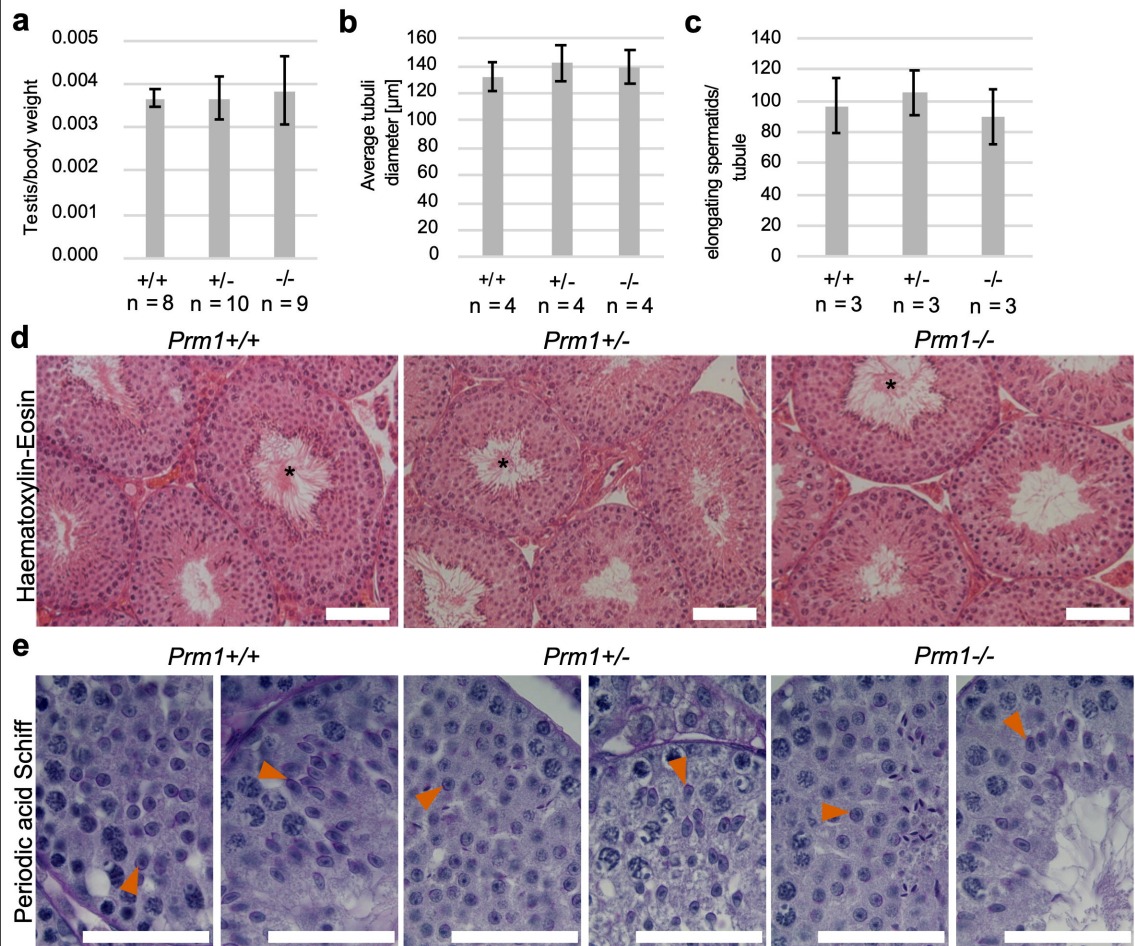

**Fig. 2**



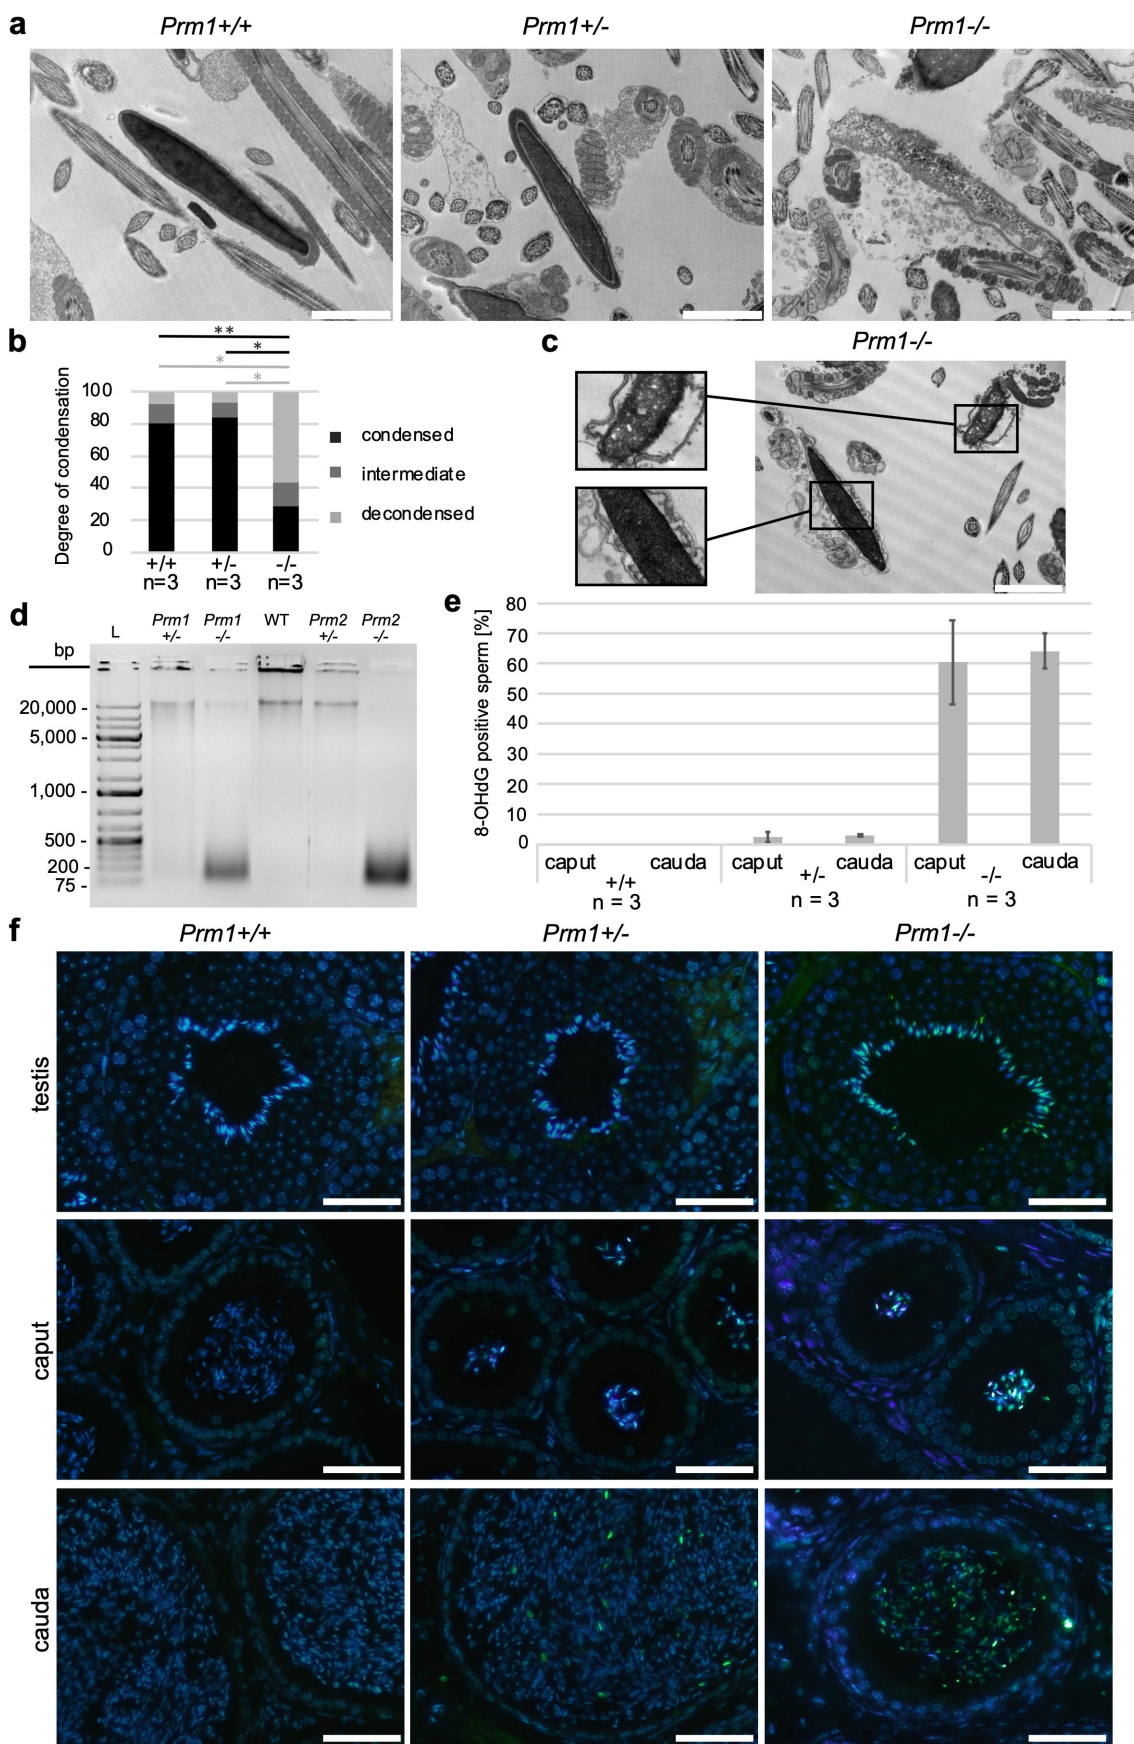

**Fig. 3**

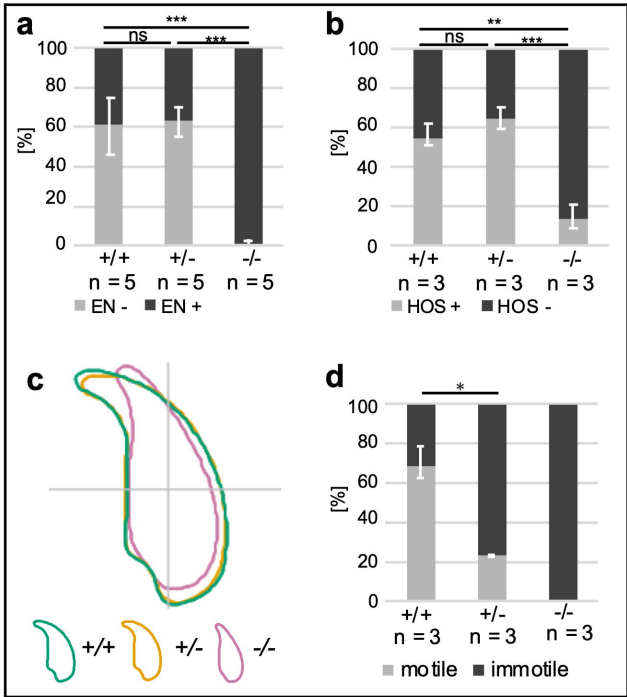

**Fig. 4**

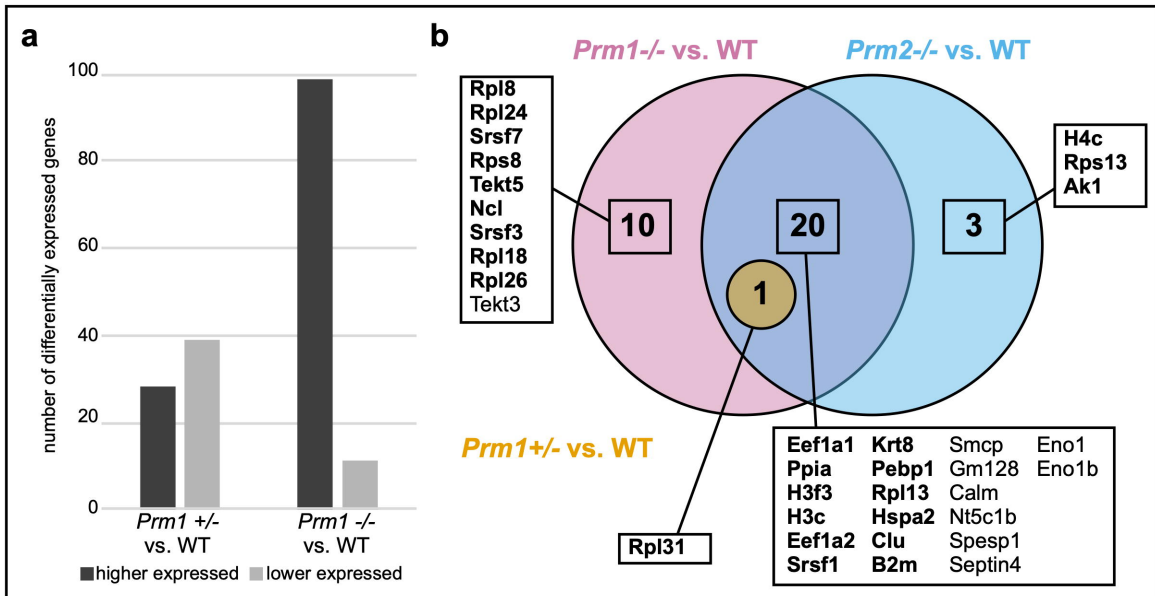

**Fig. 5**

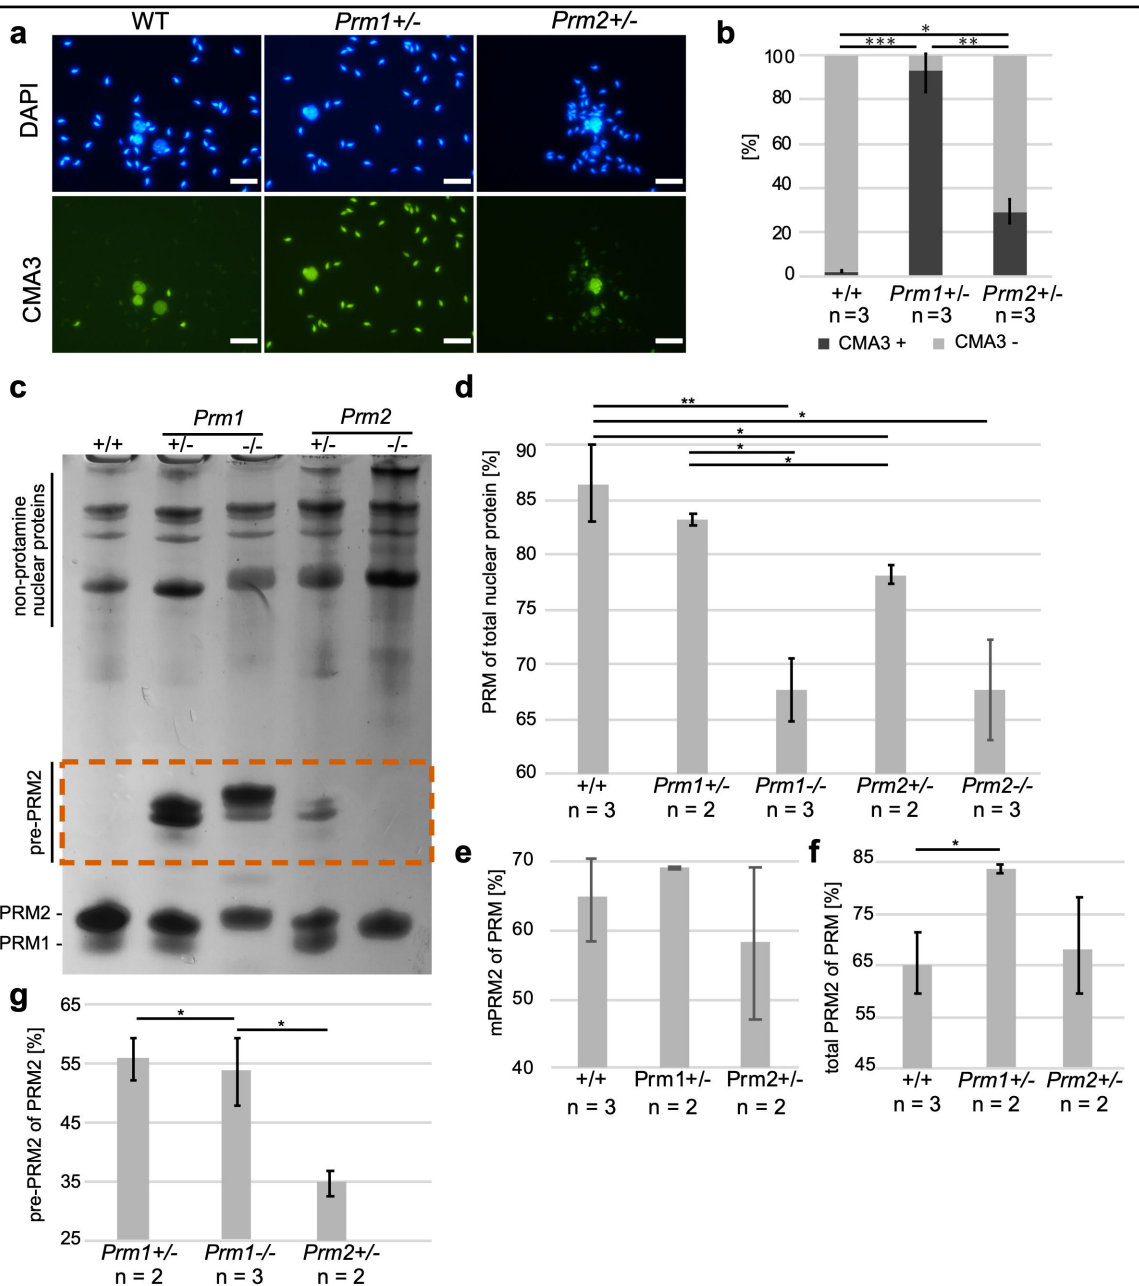

**Fig. 6**
